23 **ABSTRACT**

24

25 Zoysiagrasses (*Zoysia* spp.) are warm season turfgrasses primarily grown in the southern and  
26 transition zones of the United States. An understanding of the physiological changes that  
27 zoysiagrasses undergo during cold acclimation may shed light on physiological phenotypic traits  
28 useful in selection of freeze tolerant genotypes. We investigated the relationship between cold  
29 acclimation, protein expression, and freeze tolerance in cold-acclimated (CA) and non-acclimated  
30 (NCA) plants of *Zoysia japonica* Steud. cultivars ‘Meyer’ (freeze-tolerant) and ‘Victoria’ (freeze-  
31 susceptible). Freeze tolerance was assessed using chambers reaching -6, -8, -10, and -12°C.  
32 Additionally, meristematic tissues from the grass crowns of ‘Meyer’ and ‘Victoria’ were harvested  
33 for proteomic analysis after a four week cold acclimation period. Freeze testing indicated that cold  
34 acclimation accounted for a 1.9-fold increase in plant survival compared to the non-acclimation  
35 treatment. Overall, proteomic analysis identified 62 protein spots having at least a twofold change  
36 in abundance under cold acclimation. Nine and 22 unique protein spots were identified for Meyer  
37 and Victoria, respectively, with increased abundance (up-regulated) or decreased abundance  
38 (down-regulated). In addition, 23 shared protein spots were found among the two cultivars having  
39 differential expression in response to cold acclimation. In Meyer, protein response to cold  
40 acclimation was primarily upregulated, while in Victoria, protein response was primarily  
41 downregulated. These cold acclimation responsive proteins were found to be involved primarily  
42 in transcription, metabolism, protein destination and storage, and energy production. As identified  
43 through MALDI-TOF/TOF mass spectrometry followed matching of protein homologues against  
44 the NCBI Arabidopsis database, major proteins of interest for their association with cold  
45 acclimation were LEA 3, MAPK, SOD, GAST1, Phytochrome A, ATP synthase, AGP, PLD, and

46 PSII. Further investigation of these proteins and their functional categories may contribute to  
47 increase our understanding of the differences in freezing tolerance among zoysiagrass germplasm.

48

49

## INTRODUCTION

50

51 Zoysiagrasses (*Zoysia* spp.) are warm season perennial turfgrasses primarily grown in the  
52 warm-humid and transitional climatic zones of the United States. They are geographically  
53 constrained to these regions because of their limited winter hardiness. Zoysiagrasses are popular  
54 for their low maintenance requirements as well as their slow growth habit, high shoot density, and  
55 tolerance to many abiotic stresses such as drought and shade [1]. These attributes make  
56 zoysiagrass especially well-suited for home lawns, landscapes, and golf courses and creates a  
57 demand for more freeze tolerant cultivars that can be used in the colder climates of the Northern  
58 US.

59 Varying levels of winter injury have been observed among zoysiagrass genotypes. The two  
60 most popular species of zoysiagrass in the U.S., *Zoysia japonica* Steud. and *Zoysia matrella* (L.)  
61 Merr., have significantly different levels of winter injury and spring green-up as first reported by  
62 Forbes and Ferguson [2]. Both in the field and freeze chamber studies, *Z. japonica* genotypes  
63 show more average freeze tolerance than *Z. matrella* genotypes [3, 4, 5]. Patton and Reicher [5]  
64 reported that the  $LT_{50}$ s for *Z. japonica* commercial cultivars range from -9.5°C to -11.5°C for  
65 ‘Victoria’ and ‘Meyer’, respectively. Additionally,  $LT_{50}$ s have been found to differ depending on  
66 the origin of the tested material and freeze testing protocol [3, 4, 5, 6].

67 Cold acclimation refers to the natural physiological process that takes place in a plant when  
68 it is exposed to low but above freezing temperatures. Studies in zoysiagrass [4, 5, 6], as well as

69 saltgrass (*Distichlis spicata* (L.) Greene) [7], buffalograss (*Bouteloua dactyloides* (Nutt.) Engelm.)  
70 [8], bermudagrass (*Cynodon dactylon* (L.) Pers. × *C. transvaalensis* Burt-Davy) [9, 10] and St.  
71 Augustinegrass (*Stenotaphrum secundatum* (Walt.) Kuntze) [11, 12, 13] have indicated that warm-  
72 season grasses respond well to cold acclimation suffering less injury from freezing when  
73 acclimated. Hinton et al., [4] found that across nine different zoysiagrass cultivars with varying  
74 LT<sub>50S</sub>, samples collected in the winter (after cold acclimation) were consistently more freeze  
75 tolerant in controlled environment freezing tests than samples collected in the spring (non-  
76 acclimated/de-acclimated).

77         Although field evaluation of freeze tolerance provides the most realistic indication of how  
78 a cultivar will perform through winter, variable environmental conditions across year and location  
79 can make consistent and reproducible winter stress very difficult to attain [14]. Controlled  
80 environment freeze tests may be a more cost-effective and efficient way to assess cold acclimation  
81 and freeze tolerance of turfgrass species and generally corresponded well with field screenings [8,  
82 14, 15]. This constancy demonstrates that plants most likely undergo similar physiological changes  
83 during cold acclimation, freezing, and deacclimation in temperature controlled chambers as in the  
84 field. In zoysiagrass, freezing chambers have been successfully used to evaluate the low  
85 temperature tolerance of a variety of genotypes [3, 4, 5, 16].

86         Our understanding of the physiological changes that zoysiagrass undergoes during cold  
87 acclimation has been somewhat limited. Zhang et al. [17], investigated response to cold  
88 acclimation in zoysiagrass cultivars 'Meyer' and 'Cavalier' to identify changes in hormones and  
89 dehydrin expression. Most notably, they found an increase in abscisic acid and dehydrin levels,  
90 and a decrease in cytokinin levels in Meyer compared to Cavalier, which may play a role in winter  
91 survival and freeze tolerance. Patton et al. [18, 19] compared levels of compounds suspected to be

92 associated with freeze tolerance such as carbohydrates, organic acids, and soluble proteins at  
93 various points in the cold acclimation process. The study found that carbohydrates such as glucose  
94 and sucrose increase in stolons during seasonal temperature decreases in zoysiagrass, similar to  
95 what is known to occur in other warm season turfgrasses such as saltgrass (*Distichlis spicata* var.  
96 *stricta* (L.) Greene) [7], centipedegrass (*Eremochloa ophiuroides* (Munro) Hack.) [20] and  
97 buffalograss (*Buchloe dactyloides* (Nutt.) Englem.) [21]. However, a comparison between LT<sub>50</sub>  
98 and sucrose concentration in CA grasses revealed no relationship with freezing tolerance. Despite  
99 this result, evidence suggested that genotypes with poor freezing tolerance produce more sucrose  
100 during acclimation than genotypes with high freeze tolerance, and that total reducing sugars such  
101 as glucose likely play a role in total freezing tolerance. Proline concentration is known to increase  
102 dramatically during cold acclimation due to an uptake in synthesis with freeze tolerance improving  
103 with increased proline [19]. Santarius [22] found that proline protects membranes using  
104 hydrophobic interactions, osmotic adjustment, and decreased water potential, but it is less efficient  
105 as temperatures decline. Lastly, Zhang et al. [6] evaluated changes in lipid composition during  
106 cold acclimation, but found no consistent relationship between lipid classes and zoysiagrass  
107 freezing tolerance.

108         Comprehensive studies of the proteins involved in cold acclimation as well as their  
109 functions may lead to more accurate and efficient selection of associated genes in zoysiagrass.  
110 One such study, by Xuan et al. [23] performed quantitative analysis of protein accumulation in  
111 stolon tissues collected from two species, *Z. japonica* cv. Meyer and *Z. matrella* cv. Diamond,  
112 during cold acclimation. Forty-five proteins with a two-fold change in expression were  
113 functionally identified as playing a role in key functional protein classes such as redox  
114 homeostasis, signal transduction, photosynthesis, and energy metabolism among others. A close

115 examination of the proteins involved suggests that a greater energy supply is needed to respond to  
116 cold stress in zoysiagrass stolons. Meyer's ability to respond to cold stress most likely is related to  
117 its increased ROS scavenging ability, photosynthesis, protein synthesis, proteolysis, and its greater  
118 energy reserves. However, it may be relevant to note that the  $LT_{50}$ s of the two cultivars in this  
119 study was determined through electrolyte leakage, a method which tends to overestimate the  $LT_{50}$ ,  
120 rather than whole plant survival. Furthermore, their use of stolons rather than meristematic tissues  
121 from the grass crown may lead to different inferences as a result of the specialization of plant  
122 tissues. To identify genomic regions which play a role in freezing tolerance, Holloway et al. [24]  
123 generated a high density linkage map of *Zoysia japonica*. Used in conjunction with phenotypic  
124 data on winter injury, establishment, and turf quality, this map allowed for the identification of  
125 seven winter injury associated QTL on chromosomes 8, 11, and 13. A BLAST study into these  
126 QTL of interest identified coding regions for proteins associated with abiotic stress tolerance in  
127 other species. Proteins of interest were associated with signal transduction pathways such as the  
128 mitogen-activated protein kinase pathway, as well as DRE family protein coding regions, both of  
129 which are linked to abiotic stress response and mitigation. These findings provided a compelling  
130 case for which proteins and pathways play a role in freeze tolerance.

131         Furthering our understanding of the physiological changes that zoysiagrass undergoes  
132 during cold acclimation may shed light on phenotypic traits useful in selection of more freeze  
133 tolerant genotypes. To investigate the relationship between cold acclimation, protein expression,  
134 and freeze tolerance in zoysiagrasses, *Z. japonica* cultivars with a reported differing level of  
135 freeze susceptibility and previously studied quantitative trait loci (QTL) associated with winter  
136 hardiness [24] were investigated here. The objectives of this study were to (i) compare the effects

137 of cold acclimation treatments on freeze tolerance in these cultivars and (ii) to identify proteins  
138 associated with cold acclimation and freezing tolerance.

139

## 140 **MATERIALS AND METHODS**

### 141 **Plant materials and growing conditions**

142 Commercial cultivars ‘Meyer’ (*Z. japonica*, [25]) and ‘Victoria’ (*Z. japonica*, [26]) were selected  
143 for evaluation due to their reported range in freeze susceptibility (acclimated LT<sub>50</sub> of -11.5°C and  
144 -9.5°C, respectively) [4, 5]. In the fall of 2015, cultivars were collected from research plots at the  
145 Lake Wheeler Turfgrass Field Laboratory (Raleigh, NC) and established in 24.5 cm x 50.8 cm  
146 plastic trays (Hummert International, Earth City, MO) containing Fafard P3 potting mix (Conrad  
147 Fafard Inc., Agawam, MA) in the greenhouse. In spring 2016, plants were vegetatively propagated  
148 into 2.5-cm-diameter, 12-cm-deep Ray Leach cone-tainers (Stuewe & Sons, Inc., Corvallis, OR)  
149 in USGA grade sand [27] using a single stolon or rhizome containing root, node, and shoot material  
150 according to Patton and Reicher [5]. Plants were allowed to establish for at least six weeks in the  
151 greenhouse at 27±2°C.

### 152 **Acclimation treatments**

153 After establishment in the greenhouse, plants of each genotype were randomly arranged in a EGC  
154 walk-in chamber made by Environmental Growth Chambers (510 East Washington St. Chagrin,  
155 OH 44022) and cold acclimated (CA) for four weeks. The growth chamber used a consistent light  
156 emitting diode (LED) and temperatures of 8/2°C day/night cycles with a 10-h photoperiod of 300  
157  $\mu\text{mol m}^{-2}\text{s}^{-1}$  photosynthetically active radiation [9]. Non acclimated (NA) plants of both genotypes  
158 remained in the greenhouse at 27°C during this four-week period.

### 159 **Evaluation of freezing tolerance**

160 After acclimation treatments, intact plants in cone-tainers were evaluated for freeze tolerance  
161 based on whole plant survival. Immediately before placement in the freezer, NA plants were  
162 randomized with the CA plants. Based on the capacity of the freeze chambers, plants were arranged  
163 in each rack in a randomized complete block design with two replications. Each experimental unit  
164 consisted of 10 cone-tainers for each of the genotypes by acclimation treatment combinations.  
165 Based on reported  $LT_{50s}$  [4, 5] and a pilot study in the spring of 2015, temperatures of  $-8^{\circ}\text{C}$ ,  $-9^{\circ}\text{C}$ ,  
166  $-10^{\circ}\text{C}$ , and  $-11^{\circ}\text{C}$  were selected for this study. Each rack was placed in a plastic bag to minimize  
167 desiccation during freezing [11, 12] and placed into upright Kenmore refrigerators modified with  
168 cooling fans and FE Micro-controllers PXR4 (Price's Scientific Services, Inc.). In the freezers,  
169 plants were initially held at  $-3^{\circ}\text{C}$  for 15 h to remove latent heat from the soil. The temperature was  
170 then decreased at a rate of  $-1^{\circ}\text{C h}^{-1}$  until reaching the target temperature, which was maintained  
171 for 3 h. Plants were thawed at a rate of  $2^{\circ}\text{C h}^{-1}$  until reaching the target temperature of  $3^{\circ}\text{C}$ . All  
172 trays were subsequently removed from plastic bags and placed in a walk-in growth chamber at  
173  $3^{\circ}\text{C}$  for 24 h. Finally, plants were allowed to come to room temperature ( $22^{\circ}\text{C}$ ) overnight before  
174 being returned to the greenhouse. This experiment was repeated for a total of three runs. The  
175 second run of freeze tests was discarded because of a malfunction in the commercial freezers so  
176 only data from runs one and three were used in the analysis.

177 Plants were evaluated weekly for survival for four weeks after freezing. Survival data was  
178 taken on a binary scale of 0 (death) to 1 (survival) evaluating each individual plant for the presence  
179 of green tissue [15]. Survival data collected four weeks after freezing was evaluated with a logistic  
180 regression analysis. This method uses binary data to determine the probability of survival against  
181 the temperature gradient and estimate  $LT_{50s}$  according to Dunne et al. [15]. The LOGISTIC



182 procedure in SAS version 9.4 (SAS Institute; Cary, NC) with a stepwise selection method  
183 generates a model and maximum likelihood estimates that were used to calculate odds ratios,  
184 survival probabilities, and  $LT_{50}$ s. Regression models were created to evaluate each cultivar by  
185 acclimation treatment combination as well as acclimation treatments with cultivars pooled.  
186 Temperature was treated as a continuous variable to account for variability in the commercial  
187 freezers. Non-acclimated Victoria was used as a reference variable for the generation of the logistic  
188 regression model of cultivar by acclimation treatment because it had the lowest reported  $LT_{50}$ . In  
189 the model of acclimation treatments alone, the non-acclimated treatment was considered a  
190 reference variable.

### 191 **Proteomic analysis**

192 After acclimation treatments, sixteen cone-tainers of each cultivar  $\times$  treatment combination for  
193 each of three reps were randomly selected and destructively sampled for proteomic analysis.  
194 Meristematic tissues from the grass crowns was harvested with less than 2.5 cm of root and shoot  
195 tissue remaining, and bulked for each cultivar-treatment within each run. Fresh tissues were  
196 immediately frozen in liquid nitrogen, held at  $-80^{\circ}\text{C}$  until completion of the experiment, and then  
197 lyophilized (Genesis Pilot, SP Scientific, Warminster, PA). Lyophilized tissues were then ground  
198 into a fine powder (Retsch Mill Mixer MM 400, Haan, Germany) to aide in protein extraction.  
199 Proteins were extracted from approximately 0.5 g lyophilized tissues using the trichloroacetic acid  
200 (TCA)/acetone/phenol method previously described by Xu et al. [28]. Total protein concentration  
201 was quantified according to the methods of Bradford [29] with bovine serum albumin as a standard.  
202 Separation of proteins based on first- dimension isoelectric focusing (IEF) was done by loading  
203 300 ug of protein dissolved in rehydration buffer (8M Urea, 2% Chaps, 50mM dithiothreitol (DTT)  
204 0.2% (w/v) 3/10 ampholytes, and trace amounts of Bromophenol Blue) onto immobilized pH

205 gradient (IPG) strips (pH 3-10, linear gradient, 11 cm), which were then focused in a Protean i12  
206 IEF Cell (Bio-Rad Laboratories, Hercules, CA, USA). Second- dimension sodium dodecyl  
207 sulphate-polyacrilamide gel electrophoresis (SDS-PAGE) was done on 12.5% Tris-HCL Precast  
208 Gels using a Criterion electrophoresis cell (Bio-Rad Laboratories, Hercules CA, USA), run at 80V  
209 for 20 min before switching to 100V for approximately 2 h. Gels containing protein spots were  
210 then stained using the ProteoSilver Plus Silver Stain Kit (Sigma-Aldrich, MO, USA) according to  
211 manufacturer instructions. Three technical replicates for each biological replicate were used for 2-  
212 DE, resulting in a total of nine gels per cultivar-treatment combination.

213 The 2-DE gels were scanned using a GE Typhoon FLA 9500 Phosphorimager (GE Healthcare,  
214 PA, USA). Scanned images were aligned and spot intensity was quantified using Melanie 8 (SIB  
215 Swiss Institute of Bioinformatics, Lausanne, Switzerland). Spot intensity was used to determine  
216 fold change between the non-acclimated and acclimated samples within each cultivar. Differences  
217 in protein expression between the cultivars and cold acclimation treatments were analyzed using  
218 ANOVA, and spots with a minimum of 2.0-fold difference in abundance (upwards or downwards)  
219 between cultivar, treatment, or interaction were selected. Spots that showed consistent changes  
220 throughout replicates were considered for spot excision, and selected spots were manually excised.  
221 The silver stained protein spots were de-stained using the ProteoSilver Plus Stain Kit (Sigma-  
222 Aldrich, MO, USA), and in-gel enzymatic digestion was done overnight at 37<sup>0</sup>C using Trypsin  
223 Singles, Proteomics Grade (Sigma-Aldrich, MO, USA) following manufacturer instructions for  
224 preparation of reagents.

225 The sample peptide solutions were analyzed using a MALDI-TOF/TOF mass spectrometer  
226 (Bruker UltrafleXtreme, Coventry, UK). The observed MS peaks obtained were compared using  
227 MASCOT. The NCBI non-redundant protein database using the Viridiplantae filter was used to

228 obtain the most likely protein match based on a peptide mass fingerprinting, and only the top hits  
229 were used and a score threshold of 40 was used as a cut off. The search parameters were as follows:  
230 trypsin enzyme, fixed modification of cysteine as carbamidomethylated, peptide charge state of  
231 +1, peptide tolerance of 0.5 daltons, and up to 1 missed cleavage. For automatic, high throughput  
232 functional annotation, the closest *Arabidopsis thaliana* (AT) match was run through Blast 2 Go.  
233 For functional characterization, protein homologues were identified against the NCBI *Arabidopsis*  
234 database. Further functional information was gathered from the *Arabidopsis* Information Resource  
235 database (TAIR). Proteins were classified into categories based on their function [30].

236

## 237 RESULTS AND DISCUSSION

238

239 **Freezing tests.** Treatment, temperature and the interaction between them had significant type III  
240 effects based on the Wald  $\chi^2$  in the logistic regression model (Table 1). In the model that evaluated  
241 each cultivar by treatment combination, cultivar was not a significant effect ( $p = 0.6486$ ) (Table  
242 1a). However, when cultivar was excluded from the models (Table 1b), acclimation treatment and  
243 temperature were both significant ( $p < 0.0001$ ).

244

245 **Table 1.** a) Type III analysis of stepwise-selection logistic regression model used to estimate  $LT_{50}$   
246 values for freeze tests of zoysiagrass cultivars under controlled environmental conditions: a) with  
247 and b) without cultivar included in the model.

248

| Effect                | DF | Wald Chi-Square <sup>†</sup> | Pr > ChiSq |
|-----------------------|----|------------------------------|------------|
| a)                    |    |                              |            |
| Acclimation Treatment | 1  | 0.6272                       | 0.4284     |
| Temperature           | 1  | 88.5819                      | <0.0001    |

---

|                                |   |          |         |
|--------------------------------|---|----------|---------|
| Cultivar                       | 1 | 0.2077   | 0.6486  |
| Cultivar*Acclimation Treatment | 1 | 4.6298   | 0.0314  |
| b)                             |   |          |         |
| Acclimation Treatment          | 1 | 66.9812  | <0.0001 |
| Temperature                    | 1 | 141.1069 | <0.0001 |

---

249 † Confident interval displacement diagnostic for model a = 0.89 and for model b = 0.88 indicating both models show  
250 high concordance and predictability with the data collected.  
251

252 Maximum likelihood estimates generated from the logistic model were used to assess the  
253 survivability of each acclimation treatment or cultivar by acclimation treatment combination in  
254 relation to the reference variable by way of the  $LT_{50}$  (Table 2). Because NA Victoria was used as  
255 a reference variable, all estimates show differences in freezing tolerance in relation to it. The mean  
256 separation test indicated that cultivars within acclimation treatments were significantly different  
257 ( $p < 0.05$ ). The cold acclimation treatment altered Meyer and Victoria's  $LT_{50}$ s by  $-2.66^{\circ}\text{C}$  and -  
258  $1.50^{\circ}\text{C}$ , respectively (Figure 1). Fitness of both these models showed high concordance and  
259 predictability with the data collected (Tables 1 and 2). Through modeling of acclimation  
260 treatments alone, CA plants were determined to be approximately 1.9-fold more likely to survive  
261 than NA plants (Table 2). Similar studies in zoysiagrass [4], St. Augustinegrass [11, 12, 13],  
262 bermudagrass [10], buffalograss [8] and saltgrass [7] have also reported that plants demonstrated  
263 better freeze tolerance when subjected to cold acclimation. Our results of a nearly two-fold  
264 increase supports these findings. Moreover, CA Meyer was significantly different from CA  
265 Victoria, but NA cultivars were similar to each other (Figure 1).

266

267 **Table 2.** Maximum likelihood estimates used to calculate survival probabilities and LT<sub>50</sub> values  
 268 in freeze tests of zoysiagrass under controlled environmental conditions: a) excluding cultivar from  
 269 the model and b) for each cultivar by acclimation treatment combination.

| Parameter                  | Estimate <sup>†</sup> | Wald Chi-Square <sup>††</sup> | Pr > ChiSq |
|----------------------------|-----------------------|-------------------------------|------------|
| a)                         |                       |                               |            |
| Intercept                  | 7.6470                | 130.9546                      | <0.0001    |
| Cold Acclimation Treatment | 1.8934                | 66.9812                       | <0.0001    |
| Temperature                | 0.8685                | 141.1069                      | <0.0001    |
| b)                         |                       |                               |            |
| Intercept                  | 7.7784                | 124.5539                      | <0.0001    |
| Meyer Acclimated           | 2.6222                | 58.3716                       | <0.0001    |
| Meyer Non-Acclimated       | 0.1241                | 0.1860                        | 0.6663     |
| Victoria Acclimated        | 1.4277                | 22.1395                       | <0.0001    |
| Temperature                | 0.8902                | 140.8128                      | <0.0001    |

270  
 271 <sup>†</sup> The reference variable used for the estimation of the logistic regression model was a) the non-acclimated treatment  
 272 and b) Victoria Non-Acclimated. Temperature was treated as a continuous variable for both models.

273 <sup>††</sup> Confident interval displacement diagnostic for model a = 0.84 and for model b = 0.87 indicating both models show  
 274 high concordance and predictability with the data collected.

275

276 **Figure 1.** Probability of zoysiagrass survival in controlled environment freeze tests across  
 277 temperature curves for each cultivar by acclimation treatment combination where MAC:  
 278 acclimated ‘Meyer’ with an LT<sub>50</sub> of -11.56°C, MNA: non-acclimated ‘Meyer’ with an LT<sub>50</sub> of -  
 279 8.89°C, VAC: acclimated ‘Victoria’ with an LT<sub>50</sub> of -10.30°C, and VNA: non-acclimated  
 280 ‘Victoria’ with an LT<sub>50</sub> of -8.75°C. LT<sub>50</sub> values occur at probability 0.50.

281

282 Patton et al., [5] observed that specific carbohydrates, proline, and certain proteins in CA

283 zoysiagrass were correlated with freeze tolerance in thirteen genotypes. A proteomic response to

284 cold acclimation was also observed in velvet bentgrass (*Agrotosis canina*) [31] where CA plants  
285 were not only more freeze tolerant but showed thirteen different protein spots that were  
286 differentially expressed in CA versus NA plants. Further analysis of metabolic processes that occur  
287 during cold acclimation and how they differ between these cultivars, may explain differences in  
288 freeze tolerance between *Z. japonica* genotypes.

289 **Protein abundance:** Variation in the abundance of specific proteins was assessed in response to  
290 acclimation treatment by way of 2-DE SDS-PAGE. The non-acclimated meristematic tissue  
291 samples of each cultivar were used as the baseline to control for variation between the treatments.  
292 A total of 471 protein spots were detected on the 2-DE gels. From those, 62 spots were statistically  
293 significant ( $p \leq 0.05$ ) and exhibited a minimum of a two-fold change in response to cold acclimation  
294 for at least one cultivar (Table 3). There were significant differences in expression of these 62  
295 proteins for Meyer and Victoria. In Meyer, 35 spots were higher in abundance in response to cold  
296 acclimation (12, 17, 37, 40, 44, 56, 61, 62, 64, 80, 90, 124, 162, 185, 187, 191, 201, 234, 243, 272,  
297 293, 311, 321, 340, 348, 366, 371, 401, 403, 414, 424, 438, 443, 466, 468), while five spots were  
298 lower in abundance (86, 87, 223, 240, 261). In Victoria, 46 spots were found to be in lower  
299 abundance in response to cold acclimation (17, 40, 44, 61, 62, 80, 90, 104, 114, 116, 131, 142,  
300 148, 162, 169, 184, 185, 187, 191, 193, 201, 216, 223, 238, 240, 243, 261, 265, 270, 285, 292,  
301 293, 300, 310, 311, 317, 321, 340, 348, 366, 371, 375, 401, 424, 438, 467), and seven were in  
302 higher abundance (37, 59, 75, 86, 87, 403, 468) (Figure 2). When comparing the 31 protein spots  
303 identified in both Meyer and Victoria, 23 were found to increase during cold acclimation in Meyer  
304 but decrease in abundance in Victoria. Moreover, two proteins were significantly increased for  
305 Victoria, but decreased for Meyer in response to cold acclimation. Protein spots that were unique  
306 to each cultivar were identified in order to attempt to elucidate their role in cold acclimation.

307

308

309 **Table 3:** Functional data of the hypothetical proteins matching to each identified protein spot  
 310 number as determined through Blast 2 Go. The protein name, fold change and direction of the  
 311 change were determined and listed with the accession and Glycemic Index (GI) number.

| Spot | Protein Name                                                               | Meyer     |             | Victoria  |             | Accession   | GI        |
|------|----------------------------------------------------------------------------|-----------|-------------|-----------|-------------|-------------|-----------|
|      |                                                                            | Direction | Fold Change | Direction | Fold Change |             |           |
| 12   | nudix hydrolase homolog 2                                                  | ↑         | 2.51        |           |             | NP_568687   | 18422823  |
| 17   | ovate family protein 14                                                    | ↑         | 2.68        | ↓         | -2.15       | NP_178114   | 15220029  |
| 37   | S-adenosyl-L-methionine-dependent methyltransferases superfamily protein   | ↑         | 2.47        | ↑         | 2.42        | NP_850171   | 30685043  |
| 40   | No Match                                                                   | ↑         | 2           | ↓         | -2.83       | -           | -         |
| 44   | Subtilisin-like serine endopeptidase family protein [Arabidopsis thaliana] | ↑         | 2.02        | ↓         | -3.68       | NP_565309   | 22325457  |
| 56   | NAD(P)-binding Rossmann-fold superfamily protein [Arabidopsis thaliana]    | ↑         | 2.08        |           |             | NP_196567   | 30682984  |
| 59   | GAST1 protein homolog 4                                                    |           |             | ↑         | 2.05        | NP_197027   | 15242249  |
| 61   | No Match                                                                   | ↑         | 2           | ↓         | -5.38       | -           | -         |
| 62   | ADPGlc-PPase large subunit [Arabidopsis thaliana]                          | ↑         | 3.73        | ↓         | -2.99       | NP_174089   | 15217670  |
| 64   | Late embryogenesis abundant protein 3 (LEA3)                               | ↑         | 6.7         |           |             | -           | -         |
| 75   | ovate family protein 5 [Arabidopsis thaliana]                              |           |             | ↑         | 2.19        | NP_193618   | 22328779  |
| 80   | phospholipase D beta 1 [Arabidopsis thaliana]                              | ↑         | 2.03        | ↓         | -2.67       | NP_565963   | 30688872  |
| 86   | AAA-type ATPase family protein                                             | ↓         | -7.14       | ↑         | 1.96        | NP_567238   | 30679158  |
| 87   | No Match                                                                   | ↓         | -2.22       | ↑         | 4.39        | -           | -         |
| 90   | No Match                                                                   | ↑         | 2.38        | ↓         | -2.72       | -           | -         |
| 104  | Carbohydrate-binding X8 domain superfamily protein                         |           |             | ↓         | -2.09       | NP_181895   | 30689458  |
| 114  | pentatricopeptide (PPR) repeat-containing protein [Arabidopsis thaliana]   |           |             | ↓         | -2.81       | NP_199470   | 15237467  |
| 116  | RGA-like 2                                                                 |           |             | ↓         | -2.64       | NP_186995   | 15228553  |
| 124  | transmembrane protein, putative (DUF506) [Arabidopsis thaliana]            | ↑         | 2.56        |           |             | NP_683503   | 22330691  |
| 131  | Auxin-responsive GH3 family protein                                        |           |             | ↓         | -2.05       | NP_179101   | 15226032  |
| 142  | No Match                                                                   |           |             | ↓         | -4.08       |             |           |
| 148  | phytochrome A [Arabidopsis thaliana]                                       |           |             | ↓         | -3.21       | NP_172428   | 15217562  |
| 162  | No Match                                                                   | ↑         | 2.02        | ↓         | -3.09       | -           | -         |
| 169  | ATPase, F1 complex, alpha subunit protein [Arabidopsis thaliana]           |           |             | ↓         | -1.92       | NP_178788.1 | 15226092  |
| 184  | maturase K (chloroplast) [Arabidopsis thaliana]                            |           |             | ↓         | -3.01       | NP_051040.2 | 126022795 |
| 185  | photosystem II protein I (chloroplast) [Arabidopsis thaliana]              | ↑         | 2.46        | ↓         | -3.62       | NP_051043   | 7525017   |
| 187  | No Match                                                                   | ↑         | 2.21        | ↓         | -2.86       | -           | -         |

|     |                                                                       |   |       |   |       |              |                          |
|-----|-----------------------------------------------------------------------|---|-------|---|-------|--------------|--------------------------|
| 191 | SHK1 binding protein 1 [Arabidopsis thaliana]                         | ↑ | 1.92  | ↓ | -2.48 | NP_194841    | 30688918                 |
| 193 | Nucleotidylyl transferase superfamily protein                         |   |       | ↓ | -2.68 | NP_850070    | 30682913                 |
| 201 | No Match                                                              | ↑ | 1.82  | ↓ | -2.13 | -            | -                        |
| 216 | Hypoxanthine-guanine phosphoribosyltransferase [Arabidopsis thaliana] |   |       | ↓ | -2.72 | NP_177320    | 15217571                 |
| 223 | zinc finger protein 6 [Arabidopsis thaliana]                          | ↓ | -2.08 | ↓ | -4.44 | NP_176873    | 15219811                 |
| 234 | No Match                                                              | ↑ | 2.32  |   |       | -            | -                        |
| 238 | cyclopropyl isomerase                                                 |   |       | ↓ | -2.52 | NP_568727    | 18423143                 |
| 240 | orange protein                                                        | ↓ | -1.59 | ↓ | -1.94 | NP_200975    | 15240312                 |
| 243 | Fumarylacetoacetate (FAA) hydrolase family                            | ↑ | 1.8   | ↓ | -2.0  | NP_193329    | 15234757                 |
| 261 | Pyridoxal phosphate phosphatase-related protein                       | ↓ | -1.61 | ↓ | -3.89 | NP_173213    | 79346258                 |
| 265 | RNI-like superfamily protein                                          |   |       | ↓ | -4.61 | NP_197725    | 15237286                 |
| 270 | galacturonosyltransferase 6                                           |   |       | ↓ | -3.58 | NP_563771    | 18390688                 |
| 272 | manganese superoxide dismutase 1 [Arabidopsis thaliana]               | ↑ | 1.84  |   |       | NP_187703    | 15228407                 |
| 285 | cation/H <sup>+</sup> exchanger 20 [Arabidopsis thaliana]             |   |       | ↓ | -2.24 | NP_190940    | 15231867                 |
| 292 | No Match                                                              |   |       | ↓ | -5.05 | -            | -                        |
| 293 | pentatricopeptide repeat-containing protein                           | ↑ | 1.86  | ↓ | -3.07 | -            | -                        |
| 300 | Serine protease inhibitor (SERPIN) family protein                     |   |       | ↓ | -3.47 | NP_175202    | 15220298                 |
| 310 | isopentenyltransferase 3                                              |   |       | ↓ | -3.55 | NP_567138    | 18412615                 |
| 311 | Acyl-CoA N-acyltransferases (NAT) superfamily protein                 | ↑ | 2.22  | ↓ | -1.74 | NP_180763    | 15225174                 |
| 317 | Leucine-rich repeat protein kinase family protein                     |   |       | ↓ | -5.52 | NP_178291    | 15226361                 |
| 321 | No Match                                                              | ↑ | 1.91  | ↓ | -3.51 | -            | -                        |
| 340 | No Match                                                              | ↑ | 3.11  | ↓ | -3.33 | -            | -                        |
| 348 | maturase K (chloroplast) [Arabidopsis thaliana]                       | ↑ | 1.81  | ↓ | -2.60 | XP_002949552 | <a href="#">1.26E+08</a> |
| 366 | No Match                                                              | ↑ | 2.27  | ↓ | -2.08 | -            | -                        |
| 371 | indoleacetic acid-induced protein 16                                  | ↑ | 1.98  | ↓ | -3.15 | NP_187124    | 15229343                 |
| 375 | Protein kinase superfamily protein [Arabidopsis thaliana]             |   |       | ↓ | -2.08 | NP_850360    | 186507320                |
| 401 | alpha/beta-Hydrolases superfamily protein                             | ↑ | 2     | ↓ | -1.80 | NP_565437    | 18398716                 |
| 403 | Ribosomal protein S26e family protein [Arabidopsis thaliana]          | ↑ | 1.91  | ↑ | 2.60  | NP_181591    | 15226715                 |
| 414 | general regulatory factor 2                                           | ↑ | 2.99  |   |       | NP_565176    | 18411901                 |
| 424 | RNA polymerase beta subunit (chloroplast) [Arabidopsis thaliana]      | ↑ | 2.55  | ↓ | -2.60 | NP_051051    | 7525025                  |
| 438 | Zincin-like metalloproteases family protein                           | ↑ | 2.3   | ↓ | -2.44 | NP_199967    | 79534875                 |
| 443 | MAP kinase 10                                                         | ↑ | 3.01  |   |       | NP_191538    | 15231753                 |
| 466 | Nucleotidyltransferase family protein                                 | ↑ | 3.14  |   |       | NP_568798    | 18423551                 |
| 467 | ribosomal protein L15 [Arabidopsis thaliana]                          |   |       | ↓ | -1.77 | NP_189221    | 15231867                 |



|     |                                                     |   |      |   |       |           |          |
|-----|-----------------------------------------------------|---|------|---|-------|-----------|----------|
| 468 | NB-ARC domain-containing disease resistance protein | ↑ | 2.46 | ↑ | 2.282 | NP_190237 | 15231449 |
|-----|-----------------------------------------------------|---|------|---|-------|-----------|----------|

312  
313

314 **Figure 2:** Number of protein spots identified in nodes of zoysiagrass cultivars ‘Meyer’ (freeze  
315 tolerant) and ‘Victoria’ (freeze susceptible) acclimated at 8/2°C (day/night) for four weeks,  
316 against a non-acclimated baseline.

317  
318

In Meyer, eight unique spots were identified with at least a two-fold change in response to  
319 CA, all of which were upregulated (Table 3). These proteins were associated with late  
320 embryogenesis abundant protein 3, nudix hydrolase homolog 2, putative transmembrane protein  
321 (DUF506), manganese superoxide dismutase 1, general regulatory factor 2, Rossmann-fold  
322 NAD(P)(+)-binding protein, general regulatory factor 2, MAP kinase 10, and  
323 nucleotidyltransferase family protein. Among proteins that were upregulated in response to CA  
324 in Meyer, compared to the NA baseline, three proteins were identified as being of interest: Late  
325 embryogenesis abundant protein 3 (LEA3), with a 6.7 fold change during CA (one of the highest  
326 changes observed) has been found to be functionally associated with disease and defense, and  
327 serves as a chaperone protein, to protect proteins and membranes particularly in situations of  
328 dehydration such as drought and cold stress [32]. This is consistent with previous reports of  
329 increased production of dehydrins, soluble proteins in the LEA family, in freeze tolerant  
330 zoysiagrass cultivars [17, 18]. Second, manganese superoxide dismutase 1 (SOD), with an almost  
331 two fold increase, is another disease and defense related protein which assists with reducing  
332 oxidative stress, an important factor during cold acclimation when metabolism is slowing yet light  
333 levels are still high [33]. Third, MAP Kinase 10, or mitogen-activated protein kinase  
334 (MAPK/MPK), exhibited a three-fold increase. This protein plays a crucial role in signal  
335 transduction pathways for several biotic and abiotic stresses, and also serves to regulate C-repeat

336 binding factor (CBF) gene expression during cold stress signaling in which the expression levels  
337 of CBFs determine the levels of cold-regulated (COR) gene expression and freezing tolerance [34,  
338 35, 36].

339 In Victoria, there were 20 identifiable, unique spots with at least a two-fold change, two of  
340 which were upregulated in response to CA, and 18 of which were downregulated (Table 3). Of  
341 these 20 spots, the seven proteins with the largest change in abundance were identified to be  
342 homologous with known proteins in online databases (Table 3). These predicted protein domains  
343 included Phytochrome A, GAST1 protein homolog 4, ovate family protein 5, leucine-rich repeat  
344 protein kinase family protein, galacturonosyltransferase 6, isopentenyltransferase 3, Maturase K  
345 (MatK), and RNA like superfamily protein. A few proteins of interest were identified through the  
346 differential expression in the NA vs CA treatments in Victoria. GAST1 protein homolog 4, an  
347 upregulated protein associated with cell growth and division, which serves as a GA-responsive  
348 protein [37]; Phytochrome A, with more than a 3-fold decrease, is a signal transduction related  
349 protein that plays a critical role in the cold response by sensing the changes in light conditions,  
350 and has been shown to promote *CBF* gene expression *9CBF1*, a gene encoding AP2 domain-  
351 containing transcriptional activator that binds to the low-temperature-responsive element CCGAC  
352 and induces the expression of some cold-regulated genes, increasing plant freezing tolerance and  
353 subsequent cold tolerance [38]; ATPase F1 complex, alpha subunit protein, a down regulated  
354 energy related protein that extrudes protons from cells of plants to generate electrochemical proton  
355 gradients, which has a major role in providing the energy for secondary active transport across the  
356 plasma membrane, as well as playing a role in adaptation of plants to changing conditions,  
357 particularly stress [39].

358 Expression of the numerous shared proteins between Meyer and Victoria were determined  
359 to be of interest particularly if there was significant differential regulation of the proteins between  
360 the two cultivars as a response to CA. The shared cold responsive proteins of interest were: ADP-  
361 glucose pyrophosphorylase large subunit (upregulated in Meyer and downregulated in Victoria),  
362 a key metabolism related enzyme in the starch biosynthesis pathway [40]; Phospholipase D beta 1  
363 (PLD) (upregulated in Meyer and downregulated in Victoria) which functions in metabolic  
364 processes, was implicated in the activation of cold response and may play an important, positive  
365 role in freezing tolerance [41, 42]; and Photosystem II protein I (PSII) (upregulated in Meyer and  
366 downregulated in Victoria), an energy related protein that could point to a better ability to keep  
367 photosynthesis active and therefore support energy needed for cold acclimation [43]. Glucose-1-  
368 phosphate adenylyltransferase large subunit (AGP), with a greater than three-fold upregulation in  
369 Meyer, and a greater than two-fold downregulation in Victoria, functions in the process of starch  
370 metabolism due to the significant role it plays in temperature induced yield loss, such as serving  
371 as a rate limiting step in starch biosynthesis under elevated temperatures in maize [44].

372 **Potential functions.** Due to the relative lack of genetic information on turfgrasses, proteins of  
373 interest were identified based on homology with *Arabidopsis thaliana*, as well as through  
374 supporting data on their relation to abiotic stress tolerances associated with freezing. In the present  
375 study, 62 spots showed at least a two-fold change from the control treatment. The identified protein  
376 spots determined through mass spectrometry were sorted into categories/families according to their  
377 associated functions via the TAIR database. Out of the 62 identified protein spots, only 49 could  
378 be characterized by way of category/family and/or homologous protein. Proteins that were  
379 unnamed but classified were still included. However, proteins that could not be associated with a  
380 category/family were discarded from further analysis. Some overlap was present between the

381 categories/families, but proteins were sorted according to their strongest match. Transcription and  
382 metabolism related proteins accounted for 31% and 21% of the total proteins, respectively. Energy  
383 related, and protein destination and storage related proteins made up 10% of the total identified  
384 proteins. Signal transduction related proteins consisted of four individuals (8%). The remaining  
385 categories of proteins were disease/defense and protein synthesis (3 proteins or 6% each), cell  
386 structure (two proteins or 4%), and cell growth/division and secondary metabolism (one protein or  
387 2% each) (Figure 3).

388

389 **Figure 3:** Functional categories (and their corresponding relative distributions) of proteins with a  
390 two-fold change or greater in response to cold acclimation.

391

392 Transcription. Transcription related proteins were primarily upregulated in Meyer and  
393 downregulated in Victoria, though there were a few exceptions. S-adenosyl-L-methionine-  
394 dependent methyltransferase super family was upregulated for both cultivars at a similar fold  
395 change. Zinc finger protein 6 was downregulated for both, but with a greater fold change for  
396 Victoria. The ovate family protein 5 transcriptional repressor was upregulated in Victoria. Todaka  
397 et al. [45] conducted a study in rice to investigate a large number of stress-responsive genes related  
398 to gene expression regulation, such as protein kinases and transcription factors, and direct plant  
399 protection against stress, such as metabolic enzymes, aquaporin, and late embryogenesis abundant  
400 proteins. Transcription factors play important roles in signaling cascades that lead to abiotic stress  
401 responses, by regulating the expression of downstream target genes via the utilization of cis-  
402 elements in the promoter regions of target genes under stress conditions. The dehydration-  
403 responsive element binding protein 1/C-repeat factor (DREB1/CBF) regulon has been identified

404 in Arabidopsis to function in cold stress response, particularly in the accumulation of proline,  
405 regulation of stress-responsive gene expression, induction of transcription factor expression [46],  
406 and regulation of ABA responsive gene expression [47]. Overexpression of DREB1-type genes  
407 led to enhanced expression of stress inducible genes, including cold and drought stress, and  
408 elevated tolerance levels, an indicator that the DREB1 regulon may be one of the master regulatory  
409 systems for abiotic stress responses [45]. Therefore, a major fold change in transcription related  
410 proteins related to these regulatory systems might indicate a key effect response to cold stress.

411 Metabolism. Metabolism related proteins, such as phospholipase D and glucose-1-  
412 phosphate adenylyltransferase were upregulated in CA Meyer, and downregulated in CA Victoria.  
413 Sugars are utilized by plants to counteract stressors in their natural environment. As a response to  
414 evolutionary pressures in stressful environments, there was a diversification of sugar structures  
415 and functions, most importantly the ability to modulate the expression of genes related to abiotic  
416 and biotic stress response systems through sugar/starch metabolism. Soluble sugars, as well as  
417 amino acids, polyamines, and polyols are all known to contribute to the development of cold stress  
418 tolerance mechanisms [48]. Saccharides can stabilize phospholipid membrane composition to  
419 maintain fluidity under cold stress conditions [49]. Nitrogen reserves in the form of increased  
420 abundance of certain amino acids, may function to improve overwintering and regrowth ability in  
421 plants [50]. The differential regulation of glucose-1-phosphate adenylyltransferase, supports the  
422 importance of starch metabolism. In addition to being the main storage carbohydrate in plants,  
423 starch provides a steady supply of energy when photosynthesis is not possible, resists water loss  
424 in stomatal pores, and aids cell differentiation. Under abiotic stresses, starches are remobilized to  
425 provide energy when photosynthesis becomes limited. Fructan, an important storage  
426 carbohydrates, is known to stabilize cell membranes to prevent water leakage during freezing [51].

427 Other sugars and metabolite derivatives support growth under stress conditions, as well as mitigate  
428 some of the negative effects of the stress by activating stress response cascades with signaling  
429 sugars [52].

430 Protein destination and storage. Protein destination and storage related proteins were  
431 upregulated in Meyer and downregulated in Victoria. Serpins play a critical role in the control of  
432 proteolysis, through inhibition of proteinases. Proteolysis is in turn crucial for plant stress  
433 response, defense, growth, and development. Silverman et al. [53] purports that cell lysis as a result  
434 of cold stress may release proteinases and damage cells. Therefore, plant serpins may act in a  
435 manner similar to mammalian serpins to protect cells from proteinases. The Shk1 kinase binding  
436 protein 1 (SKB1) is a floral initiator that responds to salt stress by suppressing transcription of  
437 flowering locus c (FLC) and several stress responsive genes [54]. FLC is also modulated by a  
438 flowering autonomous pathway gene (FLV) when cold temperatures are sensed to initiate cold  
439 response [55]. The upregulation of destination and storage related proteins in freeze-tolerant Meyer  
440 may serve to mediate and increase response time to damage caused by abiotic stress.

441 Energy. Proteins related to energy were differentially expressed between the two cultivars  
442 under the different acclimation treatments. Pyridoxal phosphate phosphatase-related protein was  
443 downregulated for both Meyer and Victoria CA cultivars compared to non-acclimated, with a  
444 greater fold change for Victoria. Meanwhile, ATP synthase had a two-fold downward change in  
445 Victoria only. The AAA-type ATPase family protein had a greater than two-fold downward  
446 change in Meyer, and a two-fold upward change in Victoria. Conversely, photosystem II protein I  
447 (chloroplast) had a greater than two-fold upward change in Meyer, and a greater than two-fold  
448 downward change in Victoria. Proteins related to photosynthesis, such as ATPases, are sensitive  
449 to changes in the environment, particularly those which result in a change in photoperiod, such as

450 the changing of seasons into winter. This sensitivity is due to the need to balance light energy  
451 absorption with energy consumed by plant metabolism during the process of photosynthesis.  
452 Additionally, low temperatures have been found to heighten the disparity between light absorption  
453 and metabolic needs, making it necessary to adjust photosynthesis systems to maintain balanced  
454 energy flow. There is supporting evidence that the processes which interact with photosynthesis,  
455 particularly during cold acclimation, involve several pathways leading to the regulation of  
456 acclimation to cold temperatures, including photosynthetic redox, acclimation, and sugar signaling  
457 pathways [56].

458 Protein synthesis. Proteins related to protein synthesis were upregulated in Meyer, and  
459 primarily downregulated in Victoria, with the exception of spot 403: ribosomal protein S26e  
460 family protein, which was upregulated in Victoria. The decrease in ribosomal proteins overall may  
461 play a role in translation, ribosome assembly, and proper function of mRNA under low-  
462 temperature conditions [57]. A study in tall fescue [*Schedonorus arundinaceus* (Schreb.) Dumort.  
463 syn. *Festuca arundinacea* Schreb.] demonstrated that the introduction of the  
464 isopentenyltransferase (IPT) gene enhanced cold tolerance, as well as tillering ability and  
465 chlorophyll a and b levels [58]. This gene is purportedly responsible for inhibited apical  
466 dominance, delayed senescence, and increased chlorophyll and secondary metabolite levels [59].  
467 Research in peanut (*Arachis hypogaea* L.) [60] and sugarcane (*Saccharum* spp. L.) [61] support  
468 the ability of IPT to delay stress induced plant senescence, resulting in enhanced drought and cold  
469 tolerance. Synthesis related proteins such as IPT likely play an important role in generating cold  
470 acclimation induced proteins.

471 Signal transduction. Signal transduction related proteins were upregulated in Meyer, but  
472 downregulated in Victoria. Additionally, a higher number of significant changes in signal

473 transduction related proteins occurred in Victoria at a 3:1 ratio. Research in *Arabidopsis thaliana*  
474 identified calcium as the most common signaling factor for cells to translate external stimuli into  
475 a biochemical response. In the presence of cold stress, calcium levels are elevated, and are  
476 correlated to the activation of certain chilling sensitive genes [62]. A decrease in endogenous levels  
477 of IAA-amido synthetase, as observed in Victoria, was shown to enhance drought tolerance in rice  
478 in conjugation with TLD1, as well as influence an increase in LEA gene expression [63]. A  
479 decrease in free IAA led to enhanced ROS scavenging and increased cold response and membrane  
480 permeability as well, leading to increased cold tolerance [64]. MAP kinase 10, the highly  
481 upregulated protein observed in Meyer, is known in several species, including *Arabidopsis*  
482 *thaliana*, tobacco (*Nicotiana tabacum*), tomato (*Solanum lycopersicum*), and rice (*Oryza sativa*),  
483 as a major player in plant stress signaling. The MAPK cascade is a major pathway for multiple  
484 plant stress responses through its involvement in mediating oxidative stress, as well as its  
485 interaction with several other important signaling pathways [65]. Signal transduction related  
486 proteins may be of particular interest in breeding due to their key roles in stress response pathways.

487 Disease and defense. While a small percentage of proteins related to disease and defense  
488 showed a significant fold change, all identifiable proteins showed two-fold or greater upregulation.  
489 The two proteins of particular interest in Meyer were LEA3 and SOD. Kobayashi et al., 2004  
490 observed that LEA proteins are a major downstream group involved in the ABA-dependent and  
491 independent signaling pathways for freezing tolerance in wheat and may be able to be further  
492 enhanced for increased response. Genes in the LEA family commonly encode highly hydrophilic  
493 proteins, which positively correlate with greater freezing tolerance when overexpressed.  
494 Additionally, in a similar manner to cold acclimation, light conditions influenced the accumulation  
495 of cold responsive LEA proteins. Transcriptional processes were enhanced by light and suppressed



496 by darkness in the Kobayashi et al. [66] study. SODs operate as a first line of defense against  
497 reactive oxygen species, which are increased under stress conditions. Exposure to oxidative  
498 stressors results in an increase in SODs, and induced overexpression of SODs has led to increased  
499 protection against specific stresses, though results have been mixed due to the complexity of an  
500 associated scavenging pathway [33]. However, some attempts to overexpress SOD have been  
501 successful in increasing stress response [67], and may be utilized in future breeding efforts.

502 Other proteins. Cell structure, cell growth and division, and secondary metabolism related  
503 proteins made up the smallest percentage of the significant fold changes between the two cultivars.  
504 The plasma membrane is the primary site of freezing injury, and maintaining an intact membrane  
505 can act as an effective barrier to the formation of ice crystals [68]. The 2.5 upward fold change of  
506 a transmembrane cell structure related protein in Meyer may indicate a role in the maintenance of  
507 this membrane for protection against freezing injury. GAST1 protein homolog, associated with  
508 cell growth and division, is involved in numerous biological processes, including elongation,  
509 flowering, seed development and light signaling, flowering and stem growth, shoot elongation and  
510 flower transition. Rubinovich and Weiss [37] proposed that any sort of higher growth/elongation  
511 during the cold acclimation period could potentially interfere with proper cold acclimation, such  
512 as using photosynthates towards growth rather than protection. Little information exists on the  
513 pentatricopeptide repeat contain protein, other than it may be a product of partial degradation [69].

514 In comparison to Xuan et al. [23], their study found more differential expression between  
515 cold acclimated Meyer (*Zoysia japonica*) compared to Diamond (*Zoysia matrella*), whereas our  
516 study indicated a greater change in abundance in Victoria compared to Meyer. The use of cultivars  
517 of different species in their study might provide some explanation into this difference in results.  
518 Some of the differential expression observed in that study might be attributed to inherent

519 differences between the species rather than actual differences in freeze response. They found that  
520 energy and metabolism were the largest functional categories at 23% and 21% respectively, as  
521 well as photosynthesis (13%), signal transduction (13%), and redox homeostasis and defense  
522 response (14%). While we also found these categories to be important, we had 31% of identified  
523 proteins from meristematic crown tissue as falling into the transcriptional category, in comparison  
524 with the 2% of stolon proteins associated with transcription by Xuan et al. The amount of  
525 transcription related activity may be significantly higher in crown tissue compared to stolon tissue,  
526 and therefore may be more involved in meristematic tissue growth compared to stolon growth.  
527 There was some overlap in identified proteins, particularly MAP kinase, Photosystem II, and  
528 phosphatase related proteins. Although there were several different proteins and pathways found  
529 through proteomic analysis, their study came to a similar conclusion that signal transduction and  
530 photosynthesis may explain some of the differences in freeze tolerance between Meyer and less  
531 freeze tolerant cultivars such as Diamond or Victoria. ADP glucose pyrophosphorylase  
532 (ADPGLC-PPase) and other similar ATPases were identified as potentially playing an important  
533 role in carbohydrate metabolism under cold stress by Xuan et al. [23], and was also observed in  
534 our study to be significantly upregulated in Meyer and downregulated in Victoria.

535         The study by Holloway et al. [24] identified 146 proteins that were potentially associated  
536 with abiotic stress response related pathways, a number which corresponded to the putative winter  
537 hardiness QTL that had been identified through SNP-based linkage mapping. Some overlap  
538 between those previously identified winter injury stress associated proteins and the cold  
539 acclimation associated proteins in this study were found. Leucine-rich repeat receptor-like protein  
540 kinase and pentatricopeptide repeat family protein are among the most notable corresponding  
541 proteins, as well as several related kinases and auxin related proteins. The presence of these

542 proteins in both studies strengthens their association with cold stress response. Further analysis  
543 will be of great importance to confirming the findings of relevant cold acclimation associated  
544 proteins in different tissues of *Zoysia* spp.

545 **Overall cultivar differences.** The uniformity in freeze tolerance of NA cultivars suggests that the  
546 physiological changes that occur during cold acclimation may be the separating factor between  
547 freeze tolerances of zoysiagrass cultivars. The large disparity in response to cold acclimation in  
548 Meyer and Victoria is of particular interest requiring further study. The large number of down-  
549 regulated proteins observed in Victoria in response to cold acclimation might indicate a differential  
550 way in which freeze tolerant and freeze sensitive cultivars physiologically respond to cold  
551 stimulus. The upregulation of proteins in freeze tolerant Meyer may drive the acclimation process,  
552 while the downregulation of proteins in freeze sensitive Victoria may be the result of shutting  
553 down processes to conserve energy. Victoria was originally selected by its developer for its ability  
554 to perform well under California growing conditions of drought and high temperatures with the  
555 ability to remain green during the onset of winter dormancy [26]. Conversely, Meyer zoysiagrass  
556 originated from Korea and was selected in Virginia and Maryland for its survival in the Northeast  
557 and Midwest despite its “disadvantage” of poor winter color [25, 1]. Under stress conditions,  
558 reduced photosynthesis can limit carbon supply and biomass production, resulting in reduced  
559 growth and fitness of the plant. However, plants that utilize starch remobilization can avoid these  
560 dangers by providing an alternate source of energy and carbon to survive and even mitigate the  
561 effects of a stressful environment [52]. The high level of downregulation in unique protein spots  
562 in Victoria, may be a contributing factor of reducing photosynthesis, and therefore sensitivity to  
563 temperatures possibly allowing for improved fall color but reduced cold acclimation. Meyer adapts  
564 to cold temperatures by upregulating protein expression, and has shown higher levels of starch

565 metabolizing proteins that may help with remobilization. However, further investigation is needed  
566 to verify these hypotheses.

567 Freeze tolerance is believed to be correlated with the accumulation of soluble proteins,  
568 notably by a general increase in winter and subsequent decline in spring [68]. However, as  
569 observed in this study, it is not always an increase in protein accumulation during cold acclimation,  
570 but rather about overall quantitative changes that occur during cold acclimation which contribute  
571 to freezing tolerance. Although the largest percentage of identified proteins were functionally  
572 related to transcription and metabolism, the relative importance of these proteins to cold  
573 acclimation and freezing tolerance is still being researched. Based on the functional data behind  
574 homologous proteins in related species, the major proteins of interest for their association with  
575 cold acclimation are LEA 3, MAPK, SOD, GAST1, Phytochrome A, ATP synthase, AGP, PLD,  
576 and PSII. The diversity in the metabolic pathways these proteins follow further emphasizes the  
577 complexity of abiotic stress response systems. The differential reactions between Meyer and  
578 Victoria to cold acclimation highlight the need for greater depth of knowledge on the mechanisms  
579 behind cold and freeze stress response, particularly the metabolic differences. Determining the  
580 nature of protein composition changes in the crown tissue of zoysiagrass genotypes following cold  
581 acclimation will aid in the development of new breeding strategies to produce cultivars with  
582 increased freezing tolerance.

583

584 **Acknowledgements:** This research was supported in part with funding provided by the NC State  
585 University Plant Breeding Consortium, the NC State University Center for Turfgrass  
586 Environmental Research and Education, and the United States Golf Association.

587

## REFERENCES

- 588 1. Patton, A.J., B.M. Schwartz, and K.E. Kenworthy. 2017. Zoysiagrass (*Zoysia* spp.) history,  
589 utilization, and improvement in the United States: A Review. *Crop Science*. 57:S-37–S-72.  
590 doi:10.2135/cropsci2017.02.0074
- 591 2. Forbes I, Ferguson M. Observations on the *Zoysia* grasses. *The Greenkeepers' Reporter*,  
592 1947;15(2):7-9.
- 593 3. Dunn, J, Bughrara, S, Warmund, M and Fresenburg, B. Low Temperature Tolerance of  
594 Zoysiagrasses. *HortScience*, 1999;34(1):96-99.
- 595 4. Hinton J, Livingston D, Miller G, Peacock C, Tuong T. Freeze Tolerance of Nine  
596 Zoysiagrass Cultivars Using Natural Cold Acclimation and Freeze Chambers. *HortScience*.  
597 2012;47(1):112-115.
- 598 5. Patton, A and Reicher, Z. Zoysiagrass Species and Genotypes Differ in Their Winter Injury  
599 and Freeze Tolerance. *Crop Science*, 2007;47(4):1619.
- 600 6. Zhang, Q., Fry, J., Rajashekar, C., Bremer, D., and Engelke, M. 2009. Membrane polar lipid  
601 changes in zoysiagrass rhizomes and their potential role in freezing tolerance. *Journal of the*  
602 *American Society for Horticultural Science* 134:322-328.
- 603 7. Shahba M, Qian Y, Hughes H, Koski A, Christensen D. Relationships of Soluble  
604 Carbohydrates and Freeze Tolerance in Saltgrass. *Crop Science*. 2003;43(6):2148.
- 605 8. Qian Y, Ball S, Tan Z, Koski A, Wilhelm S. Freezing Tolerance of Six Cultivars of  
606 Buffalograss. *Crop Science*. 2001;41(4):1174.
- 607 9. Anderson J, Taliaferro C, Martin D. Evaluating Freeze Tolerance of Bermudagrass in a  
608 Controlled Environment. *HortScience*. 1993;28(9):955.

- 609 10. Anderson J, Taliaferro C, Martin D. Longer Exposure Durations Increase Freeze Damage to  
610 Turf Bermudagrasses. *Crop Science*. 2003;43(3):973.
- 611 11. Kimball J, Tuong T, Arellano C, Livingston III D, Milla-Lewis S. Assessing freeze-tolerance  
612 in St. Augustinegrass: temperature response and evaluation methods. *Euphytica*.  
613 2017;213(5).
- 614 12. Kimball J, Tuong T, Arellano C, Livingston D, Milla-Lewis S. Assessing Freeze Tolerance  
615 in St. Augustinegrass: II. Acclimation Treatment Effects. *Euphytica*. 2017;213(12).
- 616 13. Kimball J, Tuong T, Arellano C, Livingston D, Milla-Lewis S. Linkage Analysis and  
617 Identification of Quantitative Trait Loci Associated with Freeze Tolerance and Turf Quality  
618 Traits in St. Augustinegrass. *Molecular Breeding*. 2018;38(5).
- 619 14. Anderson J, Taliaferro C, Martin D. Freeze Tolerance of Bermudagrasses. *Crop Science*.  
620 2002;42(3):975.
- 621 15. Dunne J, Tuong T, Livingston III D, Milla-Lewis S. Field and Laboratory Evaluation of  
622 African Bermudagrass Germplasm for Freezing Tolerance. *Proc. Amer. Soc. Agron. Intl.*  
623 *Ann. Mtg.*, Phoenix, AZ. Nov 6-9, 2016.
- 624 16. Holloway H. Genomic Approaches for Improving Freeze Tolerance in Zoysiagrass M.SC.  
625 Thesis, North Carolina State University; 2016. Available from:  
626 <http://www.lib.ncsu.edu/resolver/1840.20/33610>
- 627 17. Zhang X, Shang C, Liu Y, Hu G, Harich K, Ervin E. Hormone and Dehydrin Expression  
628 Responses to Cold Acclimation in Two Zoysiagrass Cultivars with Contrasting Freezing  
629 Tolerance. *itsrj*. 2017;13(1):547.
- 630 18. Patton A, Cunningham S, Volenec J, Reicher Z. Differences in Freeze Tolerance of  
631 Zoysiagrasses: I. Role of Proteins. *Crop Science*. 2007;47(5):2162.

- 632 19. Patton A, Cunningham S, Volenec J, Reicher Z. Differences in Freeze Tolerance of  
633 Zoysiagrasses: II. Carbohydrate and Proline Accumulation. *Crop Science*. 2007;47(5):2170.
- 634 20. Cai Q, Wang S, Cui Z, Sun J, Ishii Y. Changes in Freezing Tolerance and its Relationship  
635 with the Contents of Carbohydrates and Proline in Overwintering Centipedegrass  
636 (*Eremochloa ophiuroides*(Munro) Hack.). *Plant Production Science*. 2004;7(4):421-426.
- 637 21. Ball S, Qian Y, Stushnoff C. Soluble Carbohydrates in Two Buffalograss Cultivars with  
638 Contrasting Freezing Tolerance. *Journal of the American Society for Horticultural Science*.  
639 2002;127(1):45-49.
- 640 22. Santarius K. Freezing of Isolated Thylakoid Membranes in Complex Media. VIII.  
641 Differential Cryoprotection by Sucrose, Proline and Glycerol. *Physiologia Plantarum*.  
642 1992;84(1):87-93.
- 643 23. Xuan J, Song Y, Zhang H, Liu J, Guo Z, Hua Y. Comparative Proteomic Analysis of the  
644 Stolon Cold Stress Response between the C4 Perennial Grass Species *Zoysia japonica* and  
645 *Zoysia matrella*. *PLoS ONE*. 2013;8(9):e75705.
- 646 24. Holloway H, Yu X, Dunne J, Schwartz B, Patton A, Arellano C et al. A SNP-based high-  
647 density linkage map of zoysiagrass (*Zoysia japonica* Steud.) and its use for the identification  
648 of QTL associated with winter hardiness. *Molecular Breeding*. 2017;38(1).
- 649 25. Grau F and Radko A. Meyer (Z-52) *Zoysia*. *USGA J. Turf Manage*. 1951;4(6): 30-31.
- 650 26. Gibeault V, Leonard M, Youngner V. Zoysiagrass plant named ‘Victoria. U.S. Plant Patent  
651 9,135. Date issued: 9 May, 1995.
- 652 27. Hatwiger C. Help your bunkers make the grade. *USGA Green Section Record*. 1998;36(6),  
653 1-4. <http://turf.lib.msu.edu/1990s/1998/981101.pd>

- 654 28. Xu C, Xu Y, Huang B. Protein Extraction for Two-Dimensional Gel Electrophoresis of  
655 Proteomic Profiling in Turfgrass. *Crop Science*. 2008;48(4):1608.
- 656 29. Bradford M. A Rapid and Sensitive Method for the Quantitation of Microgram Quantities of  
657 Protein Utilizing the Principle of Protein-Dye Binding. *Analytical Biochemistry*. 1976;72(1-  
658 2):248-254.
- 659 30. Bevan M, Bancroft I, Bent E, Love K, & al,e. Analysis of 1.9 mb of Contiguous Sequence  
660 from Chromosome 4 of *Arabidopsis thaliana*. *Nature*, 1998;391(6666), 485-8.  
661 doi:<http://dx.doi.org/10.1038/35140>
- 662 31. Espevig T, DaCosta M, Hoffman L, Aamlid T, Tronsmo A, Clarke B et al. Freezing  
663 Tolerance and Carbohydrate Changes of Two Species during Cold Acclimation. *Crop*  
664 *Science*. 2011;51(3):1188.
- 665 32. Ingram J, Bartels D. The Molecular Basis of Dehydration Tolerance in Plants. *Annual*  
666 *Review of Plant Physiology and Plant Molecular Biology*. 1996;47(1):377-403.
- 667 33. Alscher R, Erturk N, Heath L. Role of Superoxide Dismutases (SODs) in Controlling  
668 Oxidative Stress in Plants. *Journal of Experimental Botany*. 2002;53(372):1331-1341.
- 669 34. Liu S, Jiang Y. Identification of Differentially Expressed Genes under Drought Stress in  
670 Perennial Ryegrass. *Physiologia Plantarum*. 2010;139:375–387.
- 671 35. Sangwan V, Orvar B, Beyerly J, Hirt H, Dhindsa R. Opposite Changes in Membrane Fluidity  
672 Mimic Cold and Heat Stress Activation of Distinct Plant MAP Kinase Pathways. *The Plant*  
673 *Journal*. 2002;31(5):629-638.
- 674 36. Gilmour S, Sebolt A, Salazar M, Everard J, Thomashow M. Overexpression of the  
675 *Arabidopsis* CBF3 Transcriptional Activator Mimics Multiple Biochemical Changes  
676 Associated with Cold Acclimation. *Plant Physiology*. 2000;124(4):1854-1865.



- 677 37. Rubinovich L, Weiss D. The Arabidopsis Cysteine-rich Protein GASA4 Promotes GA  
678 Responses and Exhibits Redox Activity in Bacteria and in Planta. *The Plant Journal*.  
679 2010;64(6):1018-1027.
- 680 38. Wang F, Guo Z, Li H, Wang M, Onac E, Zhou J et al. Phytochrome A and B Function  
681 Antagonistically to Regulate Cold Tolerance via Abscisic Acid-Dependent Jasmonate  
682 Signaling. *Plant Physiology*. 2015;170(1):459-471.
- 683 39. Muzi C, Camoni L, Visconti S, Aducci P. Cold stress affects H<sup>+</sup>-ATPase and phospholipase  
684 D activity in Arabidopsis. *Plant Physiology and Biochemistry*. 2016;108, 328–336.
- 685 40. Vantourout P, Radojkovic C, Lichtenstein L, Pons V, Champagne E, & Martinez L. Ecto-F1-  
686 ATPase: A Moonlighting Protein Complex and an Unexpected ApoA-I Receptor. *World*  
687 *Journal of Gastroenterology*. 2010;16(47), 5925–5935.  
688 <http://doi.org/10.3748/wjg.v16.i47.5925>
- 689 41. Singh A, Pandey A, Baranwal V, Kapoor S, Pandey G. Comprehensive Expression Analysis  
690 of Rice Phospholipase D Gene Family During Abiotic Stresses and Development. *Plant*  
691 *Signaling & Behavior*. 2012;7(7):847-855.
- 692 42. Ruelland E. Activation of Phospholipases C and D Is an Early Response to a Cold Exposure  
693 in Arabidopsis Suspension Cells. *Plant Physiology*. 2002;130(2):999-1007.
- 694 43. Rapacz M. Regulation of Frost Resistance During Cold De-acclimation and Re-acclimation  
695 in Oilseed Rape. A Possible Role of PSII Redox State. *Physiologia Plantarum*.  
696 2002;115(2):236-243.
- 697 44. Greene T, Hannah L. Enhanced Stability of Maize Endosperm ADP-Glucose  
698 Pyrophosphorylase is Gained Through Mutants that Alter Subunit Interactions. *Proceedings*  
699 *of the National Academy of Sciences*. 1998;95(22):13342-13347.

- 700 45. Todaka D, Nakashima K, Shinozaki K, Yamaguchi-Shinozaki K. Toward Understanding  
701 Transcriptional Regulatory Networks in Abiotic Stress Responses and Tolerance in Rice.  
702 Rice. 2012;5(1):6.
- 703 46. Ito Y, Katsura K, Maruyama K, Taji T, Kobayashi M, Seki M et al. Functional Analysis of  
704 Rice DREB1/CBF-type Transcription Factors Involved in Cold-Responsive Gene Expression  
705 in Transgenic Rice. Plant and Cell Physiology. 2006;47(1):141-153.
- 706 47. Wang Q, Guan Y, Wu Y, Chen H, Chen F, Chu C. Overexpression of a Rice OsDREB1F  
707 Gene Increases Salt, Drought, and Low Temperature Tolerance in Both Arabidopsis and  
708 Rice. Plant Molecular Biology. 2008;67(6):589-602.
- 709 48. Tarkowski Ł, Van den Ende W. Cold Tolerance Triggered by Soluble Sugars: a Multifaceted  
710 Countermeasure. Frontiers in Plant Science. 2015;6.
- 711 49. Ruelland E, Collin S. Chilling Stress. In: Wallingford UK, CABI Publishing, Shabala S,  
712 editor. Plant Stress Physiology. 2011. pp. 94–118 10.1079/9781845939953.0094
- 713 50. Volenec J, Ourry A, Joern B. A Role for Nitrogen Reserves in Forage Regrowth and Stress  
714 Tolerance. Physiologia Plantarum. 1996;97(1):185-193.
- 715 51. Livingston D, Hinch D, Heyer A. Fructan and its Relationship to Abiotic Stress Tolerance  
716 in Plants. Cellular and Molecular Life Sciences. 2009;66(13):2007-2023.
- 717 52. Thalmann M, Santelia D. Starch as a Determinant of Plant Fitness Under Abiotic Stress. New  
718 Phytologist. 2017;214(3):943-951.
- 719 53. Silverman G, Whisstock J, Askew D, Pak S, Luke C, Cataltepe S et al. Human Clade B  
720 Serpins (ov-serpins) Belong to a Cohort of Evolutionarily Dispersed Intracellular Proteinase  
721 Inhibitor Clades that Protect Cells from Promiscuous Proteolysis. Cellular and Molecular  
722 Life Sciences (CMLS). 2004;61(3):301-325.

- 723 54. Zhang Z, Zhang S, Zhang Y, Wang X, Li D, Li Q et al. Arabidopsis Floral Initiator SKB1  
724 Confers High Salt Tolerance by Regulating Transcription and Pre-mRNA Splicing through  
725 Altering Histone H4R3 and Small Nuclear Ribonucleoprotein LSM4 Methylation. *The Plant*  
726 *Cell*. 2011;23(1):396-411.
- 727 55. Blázquez M, Ahn J, Weigel D. A Thermosensory Pathway Controlling Flowering Time in  
728 *Arabidopsis thaliana*. *Nature Genetics*. 2003;33(2):168-171.
- 729 56. Ensminger I, Busch F, Huner N. Photostasis and Cold Acclimation: Sensing Low  
730 Temperature Through Photosynthesis. *Physiologia Plantarum*. 2006;126(1):28-44.
- 731 57. Kim K, Park S, Chung Y, Chung C, Kim J, Lee J. Molecular Cloning of Low-Temperature-  
732 Inducible Ribosomal Proteins from Soybean. *Journal of Experimental Botany*.  
733 2004;55(399):1153-1155.
- 734 58. Hu Y, Jia W, Wang J, Zhang Y, Yang L, Lin Z. Transgenic Tall Fescue Containing the  
735 *Agrobacterium tumefaciens* IPT Gene Shows Enhanced Cold Tolerance. *Plant Cell Reports*.  
736 2004;23(10-11):705-709.
- 737 59. Li Y, Hagen G, Guilfoyle T. Altered Morphology in Transgenic Tobacco Plants that  
738 Overproduce Cytokinins in Specific Tissues and Organs. *Developmental Biology*.  
739 1992;153(2):386-395.
- 740 60. Qin H, Gu Q, Zhang J, Sun L, Kuppu S, Zhang Y et al. Regulated Expression of an  
741 Isopentenyltransferase Gene (IPT) in Peanut Significantly Improves Drought Tolerance and  
742 Increases Yield Under Field Conditions. *Plant and Cell Physiology*. 2011;52(11):1904-1914.
- 743 61. Belintani N, Guerzoni J, Moreira R, Vieira L. Improving Low-Temperature Tolerance in  
744 Sugarcane by Expressing the IPT Gene Under a Cold Inducible Promoter. *Biologia*  
745 *Plantarum*. 2011.

- 746 62. Knight M. Signal Transduction Leading to Low-Temperature Tolerance in *Arabidopsis*  
747 *thaliana*. Philosophical Transactions of the Royal Society of London Series B: Biological  
748 Sciences. 2002;357(1423):871-875.
- 749 63. Zhang S, Li C, Cao J, Zhang Y, Zhang S, Xia Y et al. Altered Architecture and Enhanced  
750 Drought Tolerance in Rice via the Down-Regulation of Indole-3-Acetic Acid by  
751 TLD1/OsGH3.13 Activation. Plant Physiology. 2009;151(4):1889-1901.
- 752 64. Du H, Wu N, Fu J, Wang S, Li X, Xiao J et al. A GH3 Family Member, OsGH3-2,  
753 Modulates Auxin and Abscisic Acid Levels and Differentially Affects Drought and Cold  
754 Tolerance in Rice. Journal of Experimental Botany. 2012;63(18):6467-6480.
- 755 65. Nakagami H, Pitzschke A, Hirt H. Emerging MAP Kinase Pathways in Plant Stress  
756 Signalling. Trends in Plant Science. 2005;10(7):339-346.
- 757 66. Kobayashi F, Takumi S, Nakata M, Ohno R, Nakamura T, Nakamura C. Comparative Study  
758 of the Expression Profiles of the Cor/Lea Gene Family in Two Wheat Cultivars with  
759 Contrasting Levels of Freezing Tolerance. Physiologia Plantarum. 2004;120(4):585-594.
- 760 67. Perl A, Perl-Treves R, Galili S, Aviv D, Shalgi E, Malkin S et al. Enhanced Oxidative-Stress  
761 Defense in Transgenic Potato Expressing Tomato Cu,Zn Superoxide Dismutases. Theoretical  
762 and Applied Genetics. 1993;85(5):568-576.
- 763 68. Guy C. Cold Acclimation And Freezing Stress Tolerance: Role Of Protein Metabolism.  
764 Annual Review of Plant Physiology and Plant Molecular Biology. 1990;41(1):187-223.
- 765 69. Yan S, Zhang Q, Tang Z, Su W, Sun W. Comparative Proteomic Analysis Provides New  
766 Insights into Chilling Stress Responses in Rice. Molecular & Cellular Proteomics.  
767 2005;5(3):484-496.
- 768

# Predicted Probabilities for Survival=1

With 95% Confidence Limits

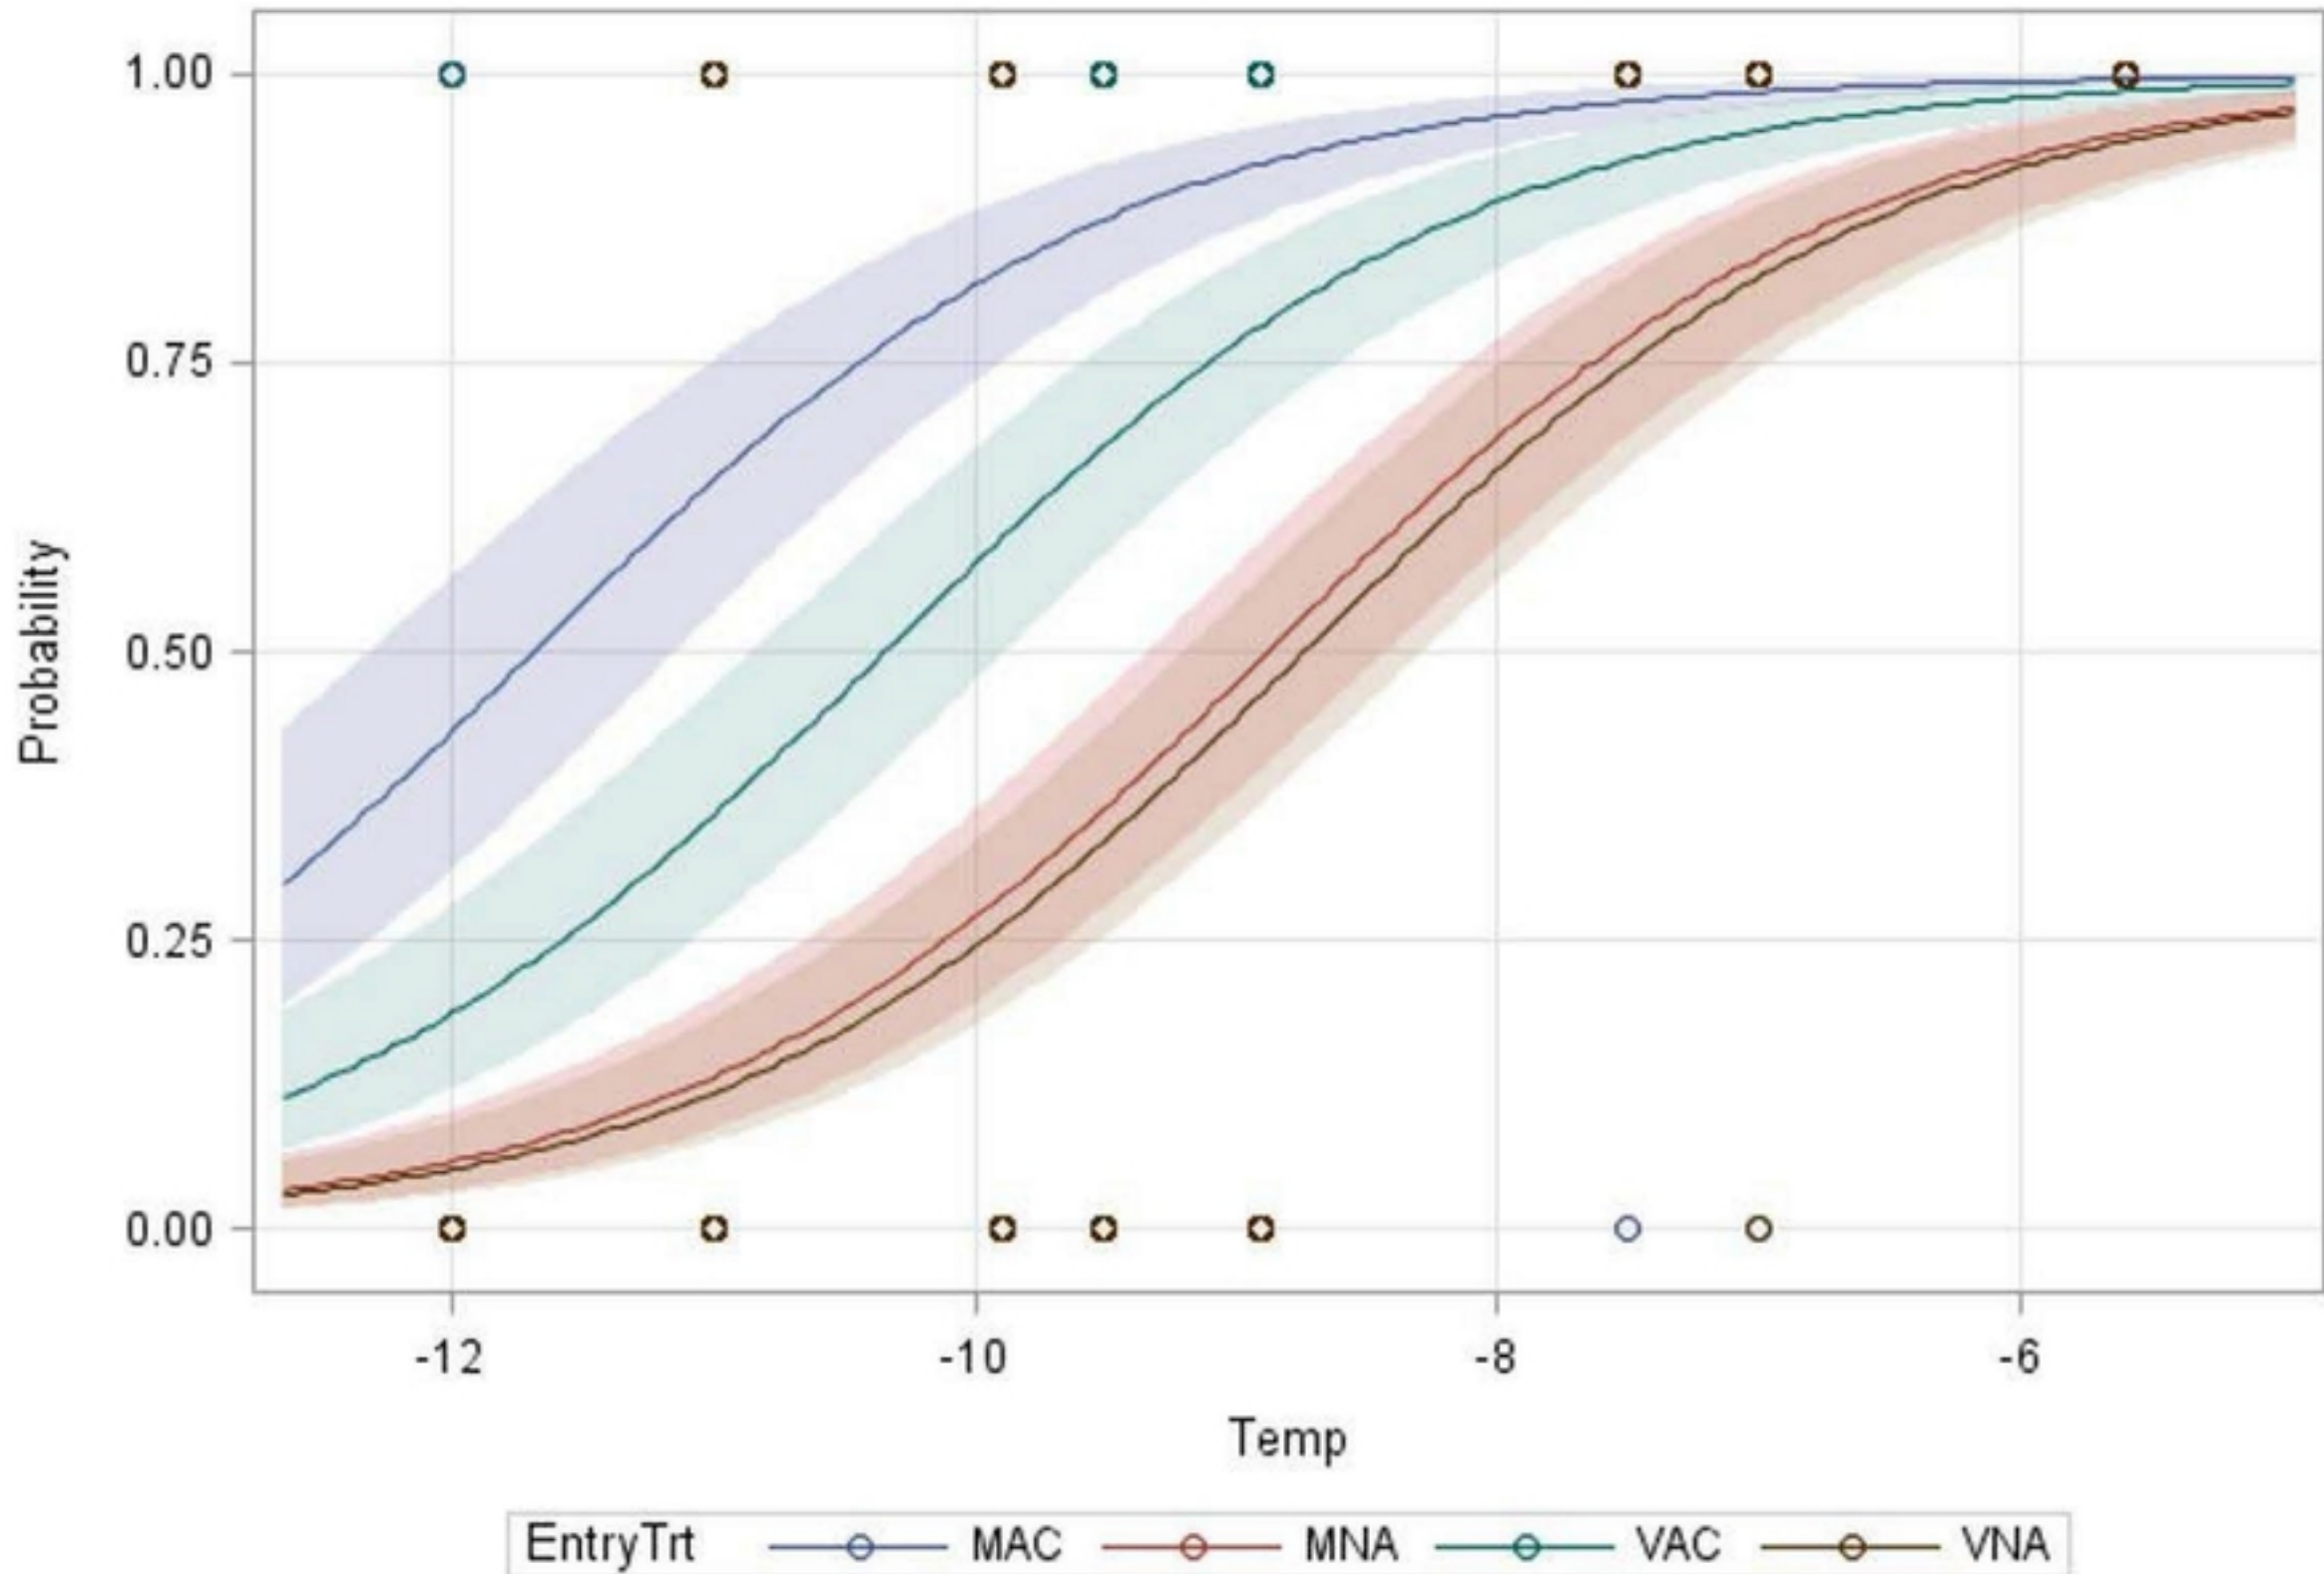

Figure 1

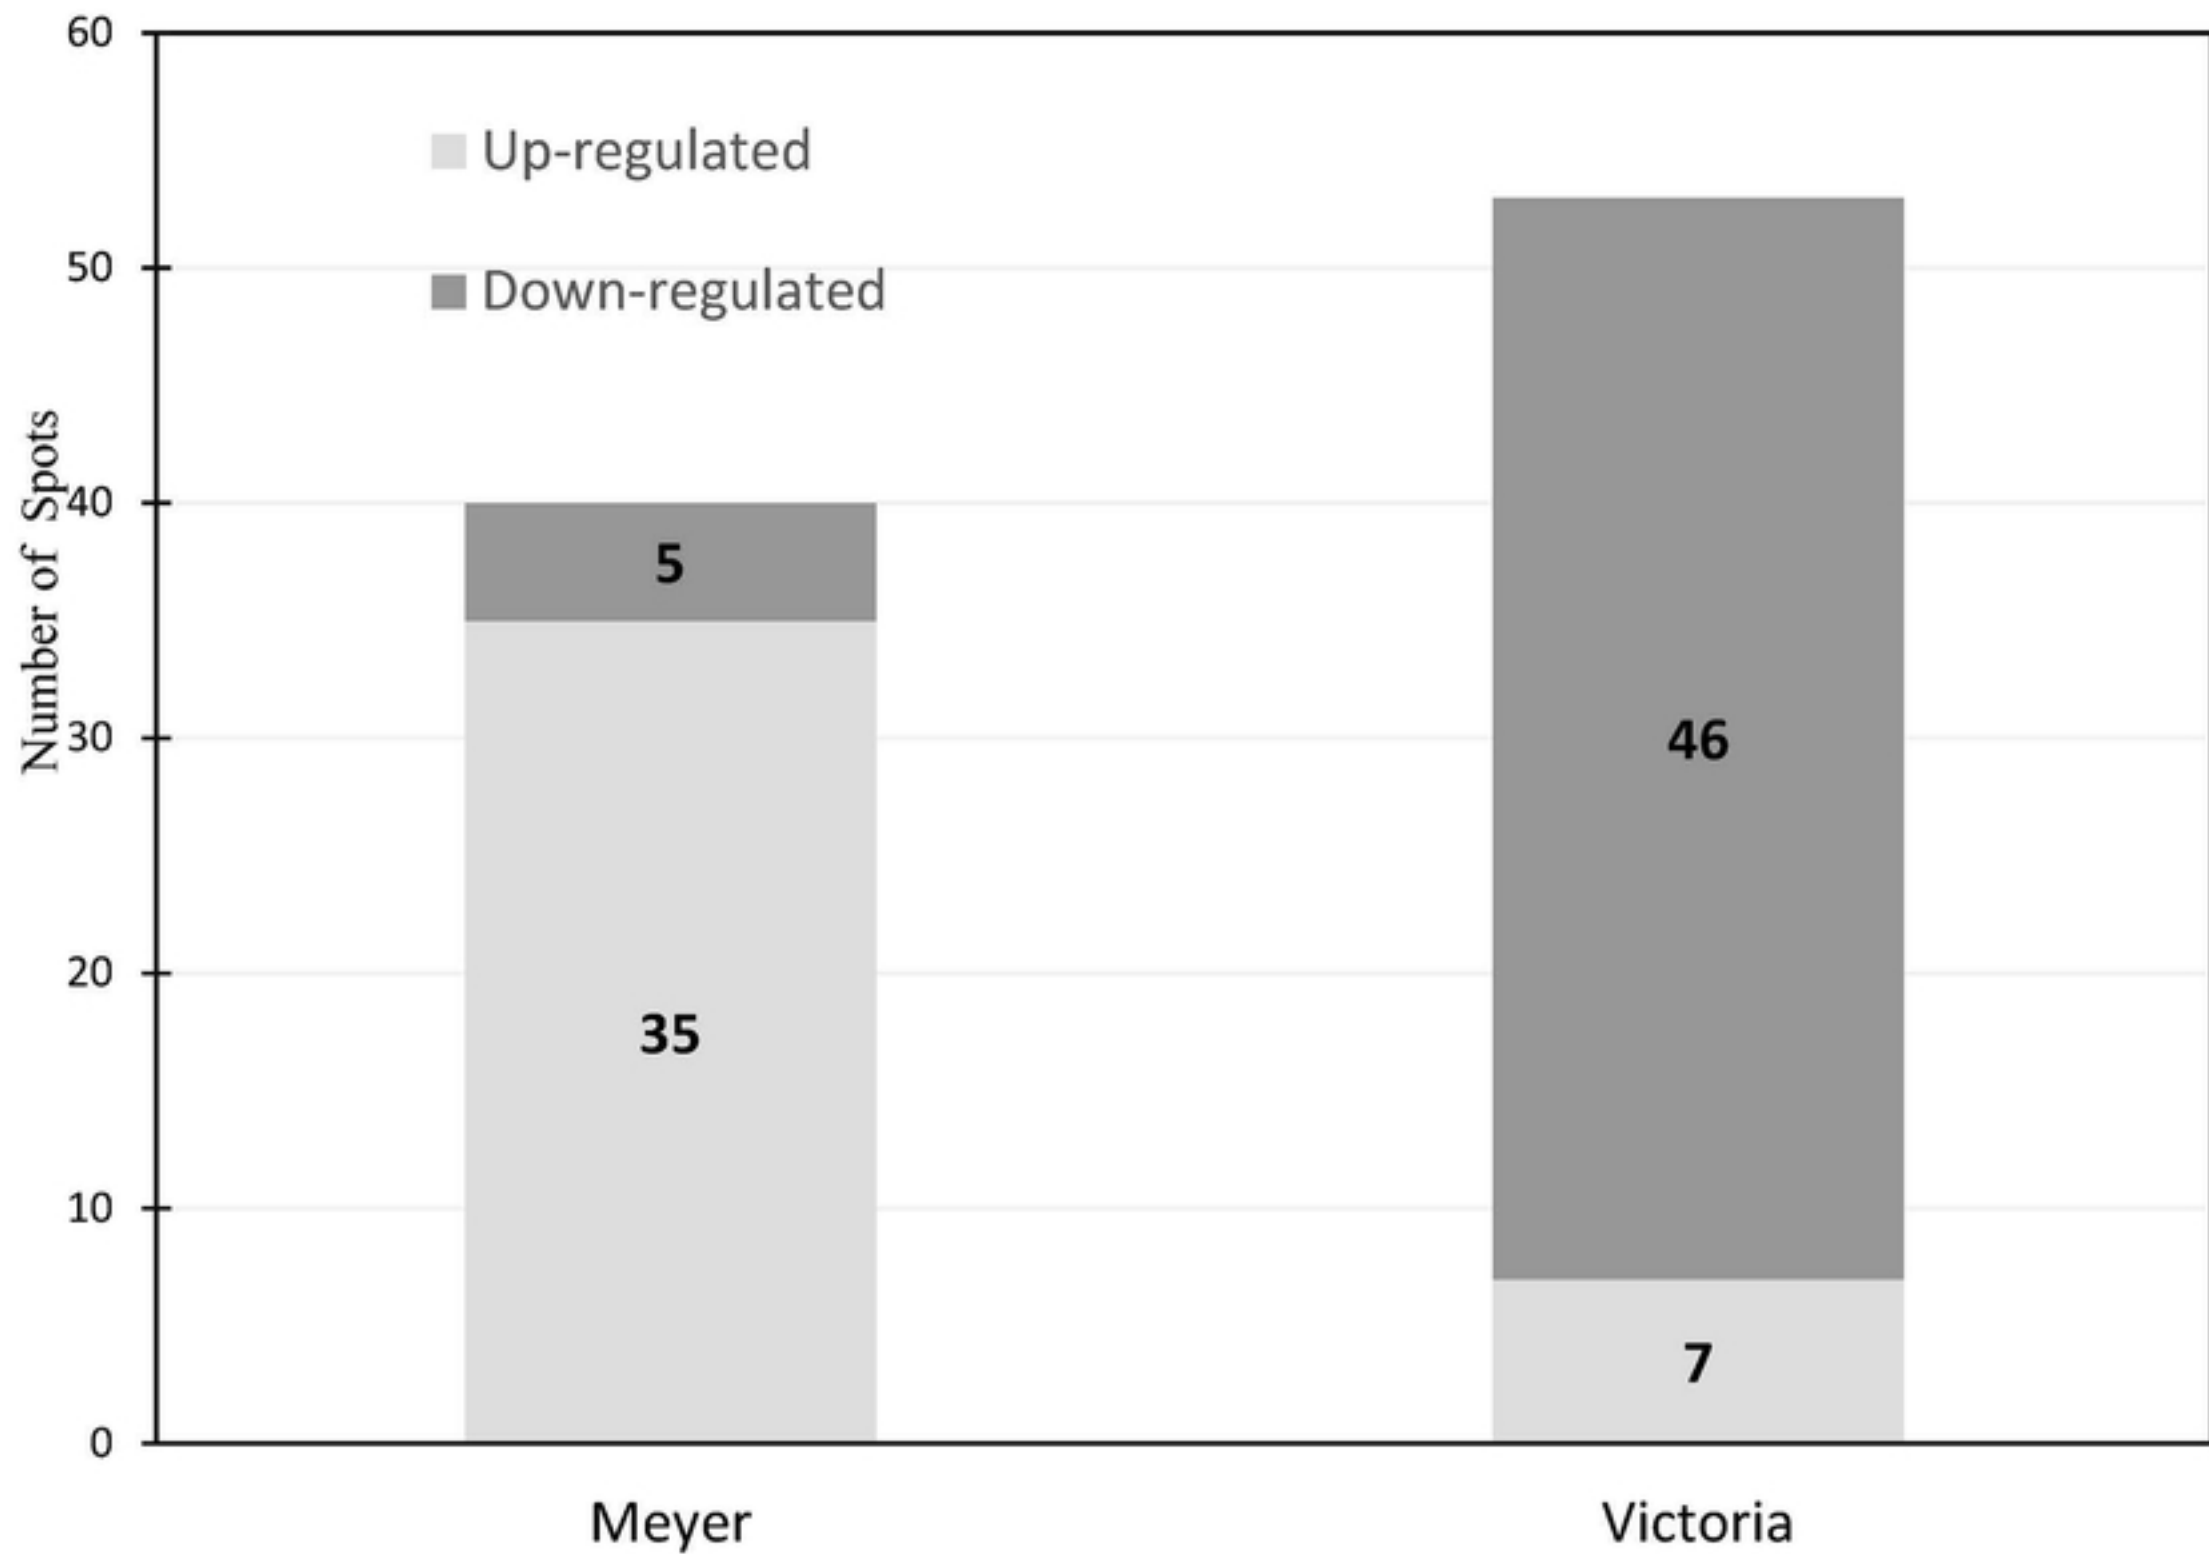

Figure 2

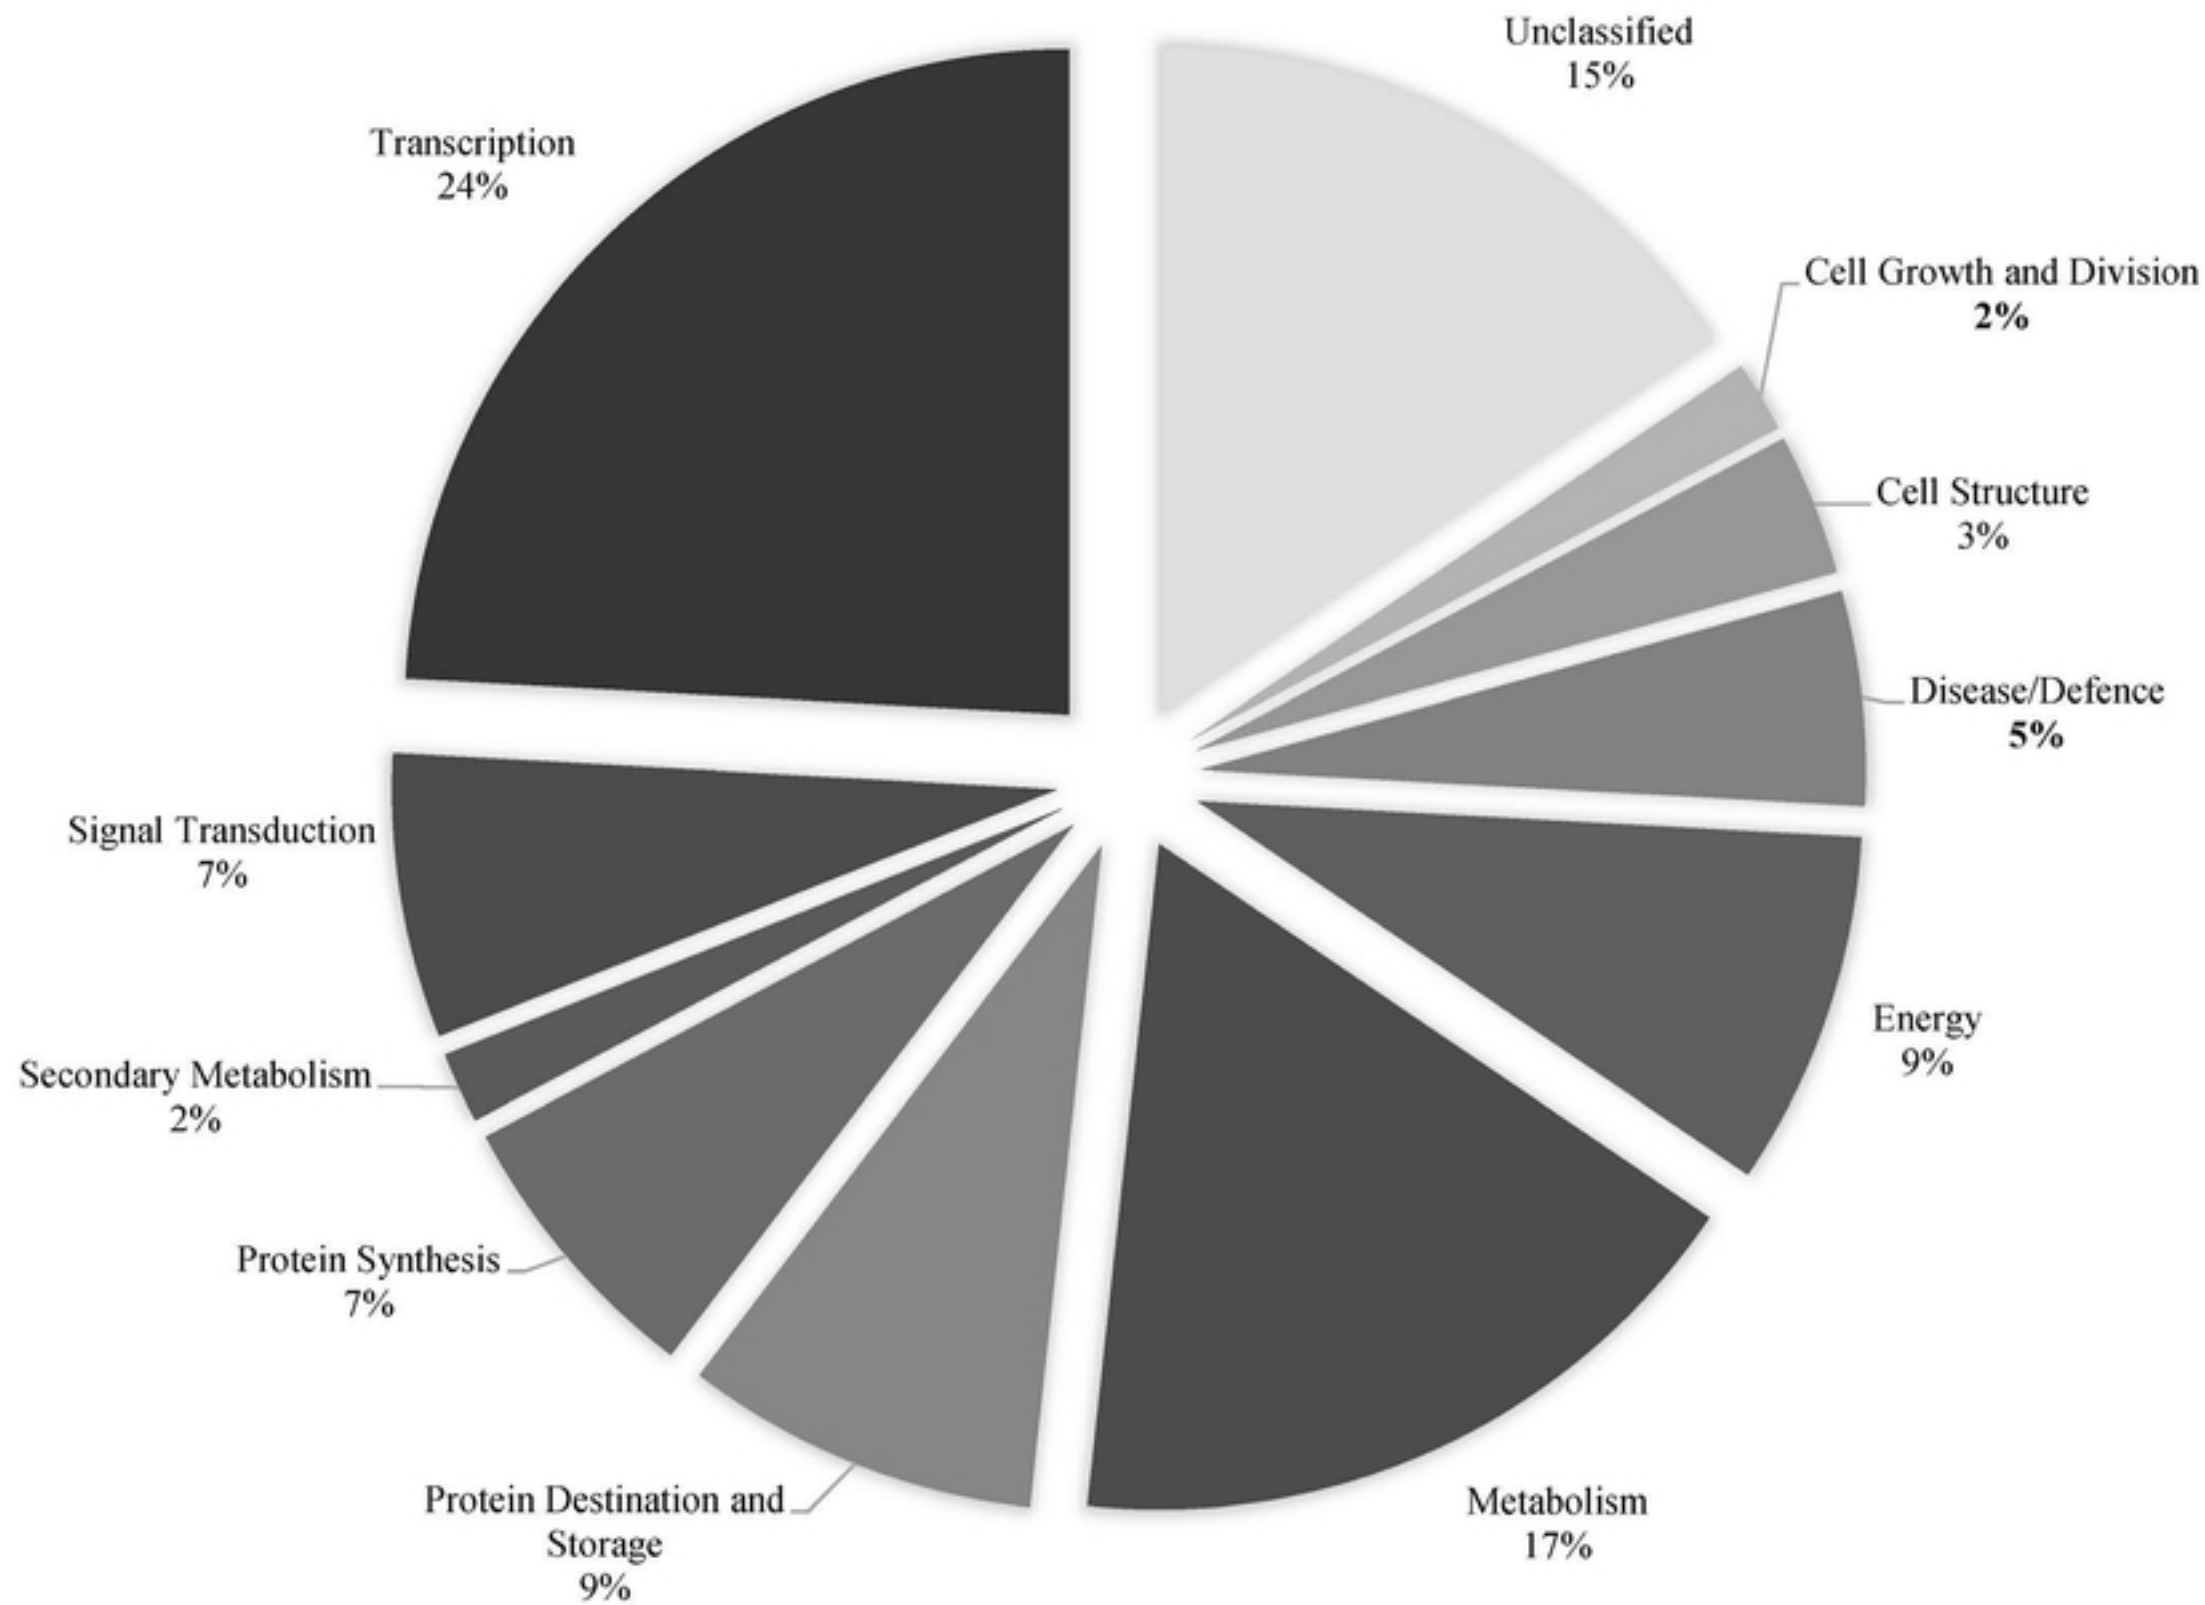

Figure 3
